# Supplementary material for: Effectiveness and harms of seasonal and pandemic influenza vaccines in children, adults and elderly: A critical review and re-analysis of 15 meta-analyses
Source: PubMed Central journal article supplement — Hum Vaccin Immunother. 2012 Jul 1;8(7):851–62. doi: 10.4161/hv.19917 (PMC3495721; doi:10.4161/hv.19917), 2012-07-01
Supplement: hvi-8-851-s01.pdf [file hvi-8-851-s01.pdf]

**Online supplemental Table 1.** List of the randomized clinical trials included in the meta-analyses on the efficacy of influenza vaccine for healthy children. The studies for which there may be some discrepancy between meta-analysis inclusion criteria and extracted data (or data exclusion) are underlined.

|                                                                                                                                  | <b>Negri et al. <sup>1</sup></b>                                                                                                                                                                                           | <b>Manzoli et al. <sup>2</sup></b>                                                                     | <b>Jefferson et al. <sup>3</sup></b>                                                                  | <b>Rhorer et al. * <sup>4</sup></b>                                                                                                  | <b>Osterholm et al. <sup>5</sup></b>                                                                                                                                                                                                                                                             |
|----------------------------------------------------------------------------------------------------------------------------------|----------------------------------------------------------------------------------------------------------------------------------------------------------------------------------------------------------------------------|--------------------------------------------------------------------------------------------------------|-------------------------------------------------------------------------------------------------------|--------------------------------------------------------------------------------------------------------------------------------------|--------------------------------------------------------------------------------------------------------------------------------------------------------------------------------------------------------------------------------------------------------------------------------------------------|
| End date of the search (mm/yy)                                                                                                   | 12/2003                                                                                                                                                                                                                    | 05/2005                                                                                                | 09/2007                                                                                               | Not reported                                                                                                                         | 02/2011                                                                                                                                                                                                                                                                                          |
| Participant's age-range (years)                                                                                                  | ≤18                                                                                                                                                                                                                        | ≤18                                                                                                    | <16                                                                                                   | ≤17                                                                                                                                  | All ages §                                                                                                                                                                                                                                                                                       |
| Study inclusion criteria for RCTs (all meta-analyses only included studies assessing wild-strain naturally-occurring infections) | <ul style="list-style-type: none"> <li>- Published in English</li> <li>- Published after 1990</li> <li>- More than 80% of healthy individuals in the sample</li> <li>- At least 30 subjects per treatment group</li> </ul> | <ul style="list-style-type: none"> <li>- More than 70% of healthy individuals in the sample</li> </ul> | <ul style="list-style-type: none"> <li>- Healthy children (unless otherwise stated)</li> </ul>        | <ul style="list-style-type: none"> <li>- FluMist® LAV</li> <li>- Culture-confirmed symptomatic influenza cases as outcome</li> </ul> | <ul style="list-style-type: none"> <li>- Vaccines licensed in USA after 1966 for LAV and 1975 for PIV</li> <li>- RT-PCR or culture-confirmed influenza cases as outcome</li> <li>- Indexed in Medline</li> <li>- Control group receiving another influenza vaccine or no intervention</li> </ul> |
| Study exclusion criteria                                                                                                         | <ul style="list-style-type: none"> <li>- Control group receiving another influenza vaccine</li> </ul>                                                                                                                      |                                                                                                        | <ul style="list-style-type: none"> <li>- Control group receiving another influenza vaccine</li> </ul> | <ul style="list-style-type: none"> <li>- Control group receiving no intervention</li> </ul>                                          |                                                                                                                                                                                                                                                                                                  |

#### **Laboratory-confirmed cases**

##### Individual datasets on PIV \*

|                                               |                                                    |                                       |                                                             |                                                           |                                                           |
|-----------------------------------------------|----------------------------------------------------|---------------------------------------|-------------------------------------------------------------|-----------------------------------------------------------|-----------------------------------------------------------|
| Wesseliuss, 1972 <sup>6</sup><br>(n=353)      | Not included: date                                 | Included – LCC-S                      | Not included: outcome only based on serology                | Not included: vaccine type                                | Not included: vaccine type                                |
| Hoskins, 1973 <sup>7</sup><br>(n=724)         | Not included: date                                 | Included – LCC-S                      | Not included: influenza B vaccine as control                | Not included: vaccine type                                | Not included: vaccine type                                |
| Beutner, 1979 <sup>8</sup><br>(n=875)         | Not included: date                                 | Included – LCC-S                      | <u>Included – LCC-S (n=525) <math>\gamma</math></u>         | Not included: only serological confirmation               | Not included: only serological confirmation               |
| Feldman (b), 1985 <sup>9</sup><br>(n=39)      | Not included: date                                 | Included – LCC-S                      | Not included: outcome only based on serology                | Not included: outcome only based on serology              | Not included: outcome only based on serology              |
| Gruber (a), 1990 <sup>10</sup><br>(n=131)     | <u>Included – LCC-C <math>\alpha</math></u>        | Included – LCC-S                      | Included – LCC-S                                            | Not included: mixed cultural and serological confirmation | Not included: mixed cultural and serological confirmation |
| Clover (b), 1991 <sup>11</sup><br>(n=136)     | <u>Included – LCC-C <math>\alpha</math></u>        | Included – LCC-S (n=95) $\Omega$      | Included – LCC-S                                            | Not included: mixed cultural and serological confirmation | Not included: vaccine not used as licensed in USA         |
| Piedra (b), 1991 <sup>12</sup><br>(n=131)     | <u>Not included: probably missed in the search</u> | Included – LCC-S (n=96) $\Omega$      | <u>Not included: unclear motivation <math>\gamma</math></u> | Not included: mixed cultural and serological confirmation | Not included: mixed cultural and serological confirmation |
| Slepushkin (b), 1993 <sup>13</sup><br>(n=140) | Included – LCC-S                                   | Not included: incorrect randomization | Not included: incorrect randomization                       | Not included: vaccine type                                | Not included: vaccine type                                |

|                                               |                                                    |                                                    |                                                                                |                                                                                |                                                                                |
|-----------------------------------------------|----------------------------------------------------|----------------------------------------------------|--------------------------------------------------------------------------------|--------------------------------------------------------------------------------|--------------------------------------------------------------------------------|
| Slepushkin (d), 1993 <sup>13</sup><br>(n=77)  | Included – LCC-S                                   | Not included: incorrect randomization              | Not included: incorrect randomization                                          | Not included: vaccine type                                                     | Not included: vaccine type                                                     |
| Khan (a), 1996 <sup>14</sup><br>(n=310)       | Included – LCC-S                                   | Included – LCC-S (n=228) <sup>Ω</sup>              | Not included: outcome only based on serology                                   | Not included: vaccine type                                                     | Not included: vaccine type                                                     |
| Hurwitz, 2000 <sup>15</sup><br>(n=97)         | Included – LCC-S                                   | Not included: children admitted in day care        | Not included: hepatitis A vaccine as control                                   | Not included: only serological confirmation                                    | Not included: only serological confirmation                                    |
| Neuzil (b), 2001 <sup>16</sup><br>(n=621)     | Included – LCC-C, LCC-S                            | Included – LCC-S (n=922) <sup>Ω</sup>              | Not included: influenza B vaccine as control in years 2 and 5 (data not split) | Not included: influenza B vaccine as control in years 2 and 5 (data not split) | Not included: influenza B vaccine as control in years 2 and 5 (data not split) |
| Neuzil (d), 2001 <sup>16</sup><br>(n=588)     | Included – LCC-C, LCC-S                            | Included – LCC-S (joined with d)                   | Not included: influenza B vaccine as control in years 2 and 5 (data not split) | Not included: influenza B vaccine as control in years 2 and 5 (data not split) | Not included: influenza B vaccine as control in years 2 and 5 (data not split) |
| Hoberman (a), 2003 <sup>17</sup><br>(n=411)   | Included – LCC-C                                   | Included – LCC-S                                   | Included – LCC-S                                                               | Not included: vaccine type                                                     | Included – LCC-C                                                               |
| Hoberman (b), 2003 <sup>17</sup><br>(n=375)   | Included – LCC-C                                   | Included – LCC-S                                   | Included – LCC-S                                                               | Not included: vaccine type                                                     | Included – LCC-C                                                               |
| <u>Individual datasets on LAV *</u>           |                                                    |                                                    |                                                                                |                                                                                |                                                                                |
| Feldman (a), 1985 <sup>9</sup><br>(n=43)      | Not included: date                                 | Included – LCC-S                                   | Not included: outcome only based on serology                                   | Not included: outcome only based on serology                                   | Not included: outcome only based on serology                                   |
| Gruber (b), 1990 <sup>10</sup><br>(n=135)     | <u>Included – LCC-C α</u>                          | <u>Not included: outcome complex to identify α</u> | <u>Not included: unclear motivation γ</u>                                      | Not included: mixed cultural and serological confirmation                      | Not included: mixed cultural and serological confirmation                      |
| Clover (a), 1991 <sup>11</sup><br>(n=138)     | <u>Included – LCC-C α</u>                          | Included – LCC-S (n=97) <sup>Ω</sup>               | Included – LCC-S                                                               | Not included: mixed cultural and serological confirmation                      | Not included: vaccine not used as licensed in USA                              |
| Piedra (a), 1991 <sup>12</sup><br>(n=130)     | <u>Not included: probably missed in the search</u> | Included – LCC-S (n=95) <sup>Ω</sup>               | <u>Not included: unclear motivation γ</u>                                      | Not included: mixed cultural and serological confirmation                      | Not included: mixed cultural and serological confirmation                      |
| Slepushkin (a), 1993 <sup>13</sup><br>(n=168) | Included – LCC-S                                   | Not included: incorrect randomization              | Not included: incorrect randomization                                          | Not included: only serological confirmation                                    | Not included: only serological confirmation                                    |
| Slepushkin (c), 1993 <sup>13</sup><br>(n=83)  | Included – LCC-S                                   | Not included: incorrect randomization              | Not included: incorrect randomization                                          | Not included: only serological confirmation                                    | Not included: only serological confirmation                                    |
| Khan (b), 1996 <sup>14</sup><br>(n=323)       | Included – LCC-S                                   | Included – LCC-S (n=242) <sup>Ω</sup>              | Not included: outcome only based on serology                                   | Not included: only serological confirmation                                    | Not included: only serological confirmation                                    |
| Belshe (a), 1998 <sup>18</sup><br>(n=1602)    | Included – LCC-C                                   | Included – LCC-S                                   | Included – LCC-S                                                               | Included – LCC-C (n=1259) <sup>ε</sup>                                         | Included – LCC-C                                                               |
| Belshe (b), 1998 <sup>18</sup><br>(n=1358)    | Included – LCC-C                                   | Included – LCC-S                                   | Included – LCC-S                                                               | Included into a separate analysis for year two                                 | Included – LCC-C                                                               |

|                                              |                         |                                          |                                                                                |                                                                                |                                                                                |
|----------------------------------------------|-------------------------|------------------------------------------|--------------------------------------------------------------------------------|--------------------------------------------------------------------------------|--------------------------------------------------------------------------------|
| Neuzil (a), 2001 <sup>16</sup><br>(n=605)    | Included – LCC-C, LCC-S | Included – LCC-S<br>(n=887) <sup>Ω</sup> | Not included: influenza B vaccine as control in years 2 and 5 (data not split) | Not included: influenza B vaccine as control in years 2 and 5 (data not split) | Not included: influenza B vaccine as control in years 2 and 5 (data not split) |
| Neuzil (c), 2001 <sup>16</sup><br>(n=569)    | Included – LCC-C, LCC-S | Included – LCC-S<br>(joined with a)      | Not included: influenza B vaccine as control in years 2 and 5 (data not split) | Not included: influenza B vaccine as control in years 2 and 5 (data not split) | Not included: influenza B vaccine as control in years 2 and 5 (data not split) |
| Vesikari (a), 2006 <sup>19</sup><br>(n=1784) | Not included: date      | Not included: date                       | Included – LCC-S                                                               | Included – LCC-C                                                               | Included – LCC-C                                                               |
| Vesikari (b), 2006 <sup>19</sup><br>(n=1119) | Not included: date      | Not included: date                       | Included – LCC-S                                                               | Included into a separate analysis for year two                                 | Included – LCC-C                                                               |
| Tam (a), 2007 <sup>20</sup><br>(n=2764)      | Not included: date      | Not included: date                       | <u>Not included: unclear motivation <math>\gamma</math></u>                    | Included – LCC-C                                                               | Included – LCC-C                                                               |
| Tam (b), 2007 <sup>20</sup><br>(n=997)       | Not included: date      | Not included: date                       | <u>Not included: unclear motivation <math>\gamma</math></u>                    | Included into a separate analysis for year two                                 | Included – LCC-C                                                               |
| Forrest, 2008 <sup>21</sup><br>(n=1041)      | Not included: date      | Not included: date                       | Not included: date                                                             | Included – LCC-C                                                               | Not included: vaccine type                                                     |
| Bracco, 2009 <sup>22</sup><br>(n=1886)       | Not included: date      | Not included: date                       | Not included: date                                                             | Included – LCC-C                                                               | Not included: vaccine type                                                     |
| Lum, 2010 <sup>23</sup><br>(n=1232)          | Not included: date      | Not included: date                       | Not included: date                                                             | Included – LCC-C                                                               | Included – LCC-C                                                               |

### **Clinically-confirmed cases**

#### Individual datasets on PIV \*

|                                             |                                                                      |                                                                      |                                                              |                                      |                                      |
|---------------------------------------------|----------------------------------------------------------------------|----------------------------------------------------------------------|--------------------------------------------------------------|--------------------------------------|--------------------------------------|
| Maynard (a), 1968 <sup>24</sup><br>(n=250)  | Not included: date                                                   | Included                                                             | Not included: influenza B vaccine as control                 | Not included: outcome not considered | Not included: outcome not considered |
| Maynard (b), 1968 <sup>24</sup><br>(n=238)  | Not included: date                                                   | Included                                                             | Not included: influenza B vaccine as control                 | Not included: outcome not considered | Not included: outcome not considered |
| Hoskins, 1973 <sup>7</sup><br>(n=724)       | Not included: date                                                   | Included                                                             | Not included: influenza B vaccine as control                 | Not included: outcome not considered | Not included: outcome not considered |
| Gruber, 1990 <sup>10</sup><br>(n=131)       | Included                                                             | Included                                                             | Included                                                     | Not included: outcome not considered | Not included: outcome not considered |
| Clover (b), 1991 <sup>11</sup><br>(n=136)   | <u>Not included: outcome complex to identify <math>\alpha</math></u> | <u>Not included: outcome complex to identify <math>\alpha</math></u> | <u>Included: data extraction unclear <math>\gamma</math></u> | Not included: outcome not considered | Not included: outcome not considered |
| Piedra (b), 1991 <sup>12</sup><br>(n=131)   | <u>Not included: probably missed in the search</u>                   | Included<br>(n=96) <sup>Ω</sup>                                      | <u>Not included: unclear motivation <math>\gamma</math></u>  | Not included: outcome not considered | Not included: outcome not considered |
| Rudenko (b), 1993 <sup>25</sup><br>(n=8144) | Included                                                             | Included<br>(n=6060) <sup>Ω</sup>                                    | Included (n=8174)                                            | Not included: outcome not considered | Not included: outcome not considered |

|                                                |                                                                      |                                                                      |                                                                               |                                      |                                      |
|------------------------------------------------|----------------------------------------------------------------------|----------------------------------------------------------------------|-------------------------------------------------------------------------------|--------------------------------------|--------------------------------------|
| Rudenko (d), 1993 <sup>25</sup><br>(n=10,603)  | Included                                                             | Included<br>(n=7503) <sup>Ω</sup>                                    | Included                                                                      | Not included: outcome not considered | Not included: outcome not considered |
| Slepushkin (b), 1993 <sup>13</sup><br>(n=140)  | Included                                                             | Not included: incorrect randomization                                | Not included: incorrect randomization                                         | Not included: outcome not considered | Not included: outcome not considered |
| Khan (a), 1996 <sup>14</sup><br>(n=354)        | Included                                                             | Included<br>(n=260) <sup>Ω</sup>                                     | <u>Not included: criteria for diagnosis heterogeneous <math>\gamma</math></u> | Not included: outcome not considered | Not included: outcome not considered |
| Colombo, 2001 <sup>26</sup><br>(n=344)         | Included                                                             | Included                                                             | Included                                                                      | Not included: outcome not considered | Not included: outcome not considered |
| Marchisio, 2002 <sup>27</sup><br>(n=133)       | Included                                                             | Not included: children admitted in day care                          | Not included: children with recurrent otitis media                            | Not included: outcome not considered | Not included: outcome not considered |
| <u>Individual datasets on LAV *</u>            |                                                                      |                                                                      |                                                                               |                                      |                                      |
| Slepushkin, 1974 <sup>28</sup><br>(n=1000)     | Not included: date                                                   | Included                                                             | <u>Not included: unclear motivation <math>\gamma</math></u>                   | Not included: outcome not considered | Not included: outcome not considered |
| Alexandrova, 1986 <sup>29</sup><br>(n=31,141)  | Not included: date                                                   | Included                                                             | Included                                                                      | Not included: outcome not considered | Not included: outcome not considered |
| Rudenko, 1988 <sup>30</sup><br>(n=7802)        | Not included: date                                                   | Not included: unclear randomization                                  | Included                                                                      | Not included: outcome not considered | Not included: outcome not considered |
| Clover (a), 1991 <sup>11</sup><br>(n=138)      | <u>Not included: outcome complex to identify <math>\alpha</math></u> | <u>Not included: outcome complex to identify <math>\alpha</math></u> | <u>Included: data extraction unclear <math>\gamma</math></u>                  | Not included: outcome not considered | Not included: outcome not considered |
| Piedra (a), 1991 <sup>12</sup><br>(n=130)      | <u>Not included: probably missed in the search</u>                   | Included<br>(96) <sup>Ω</sup>                                        | <u>Not included: unclear motivation <math>\gamma</math></u>                   | Not included: outcome not considered | Not included: outcome not considered |
| Rudenko (a), 1993 <sup>25</sup><br>(n=8861)    | Included                                                             | Included<br>(n=6777) <sup>Ω</sup>                                    | Included (n=8891)                                                             | Not included: outcome not considered | Not included: outcome not considered |
| Rudenko (c), 1993 <sup>25</sup><br>(n=11,071)  | Included                                                             | Included<br>(n=7970) <sup>Ω</sup>                                    | Included (n=10,971)                                                           | Not included: outcome not considered | Not included: outcome not considered |
| Slepushkin (a), 1993 <sup>13</sup><br>(n=168)  | Included                                                             | Not included: incorrect randomization                                | Not included: incorrect randomization                                         | Not included: outcome not considered | Not included: outcome not considered |
| Khan (b), 1996 <sup>14</sup><br>(n=383)        | Included                                                             | Included<br>(n=290) <sup>Ω</sup>                                     | <u>Not included: criteria for diagnosis heterogeneous <math>\gamma</math></u> | Not included: outcome not considered | Not included: outcome not considered |
| Rudenko (a), 1996 <sup>31</sup><br>(n=53,820)  | Included                                                             | Included                                                             | <u>Not included: epidemic started too early <math>\gamma</math></u>           | Not included: outcome not considered | Not included: outcome not considered |
| Rudenko, (b), 1996 <sup>31</sup><br>(n=61,559) | Included                                                             | Included                                                             | Included                                                                      | Not included: outcome not considered | Not included: outcome not considered |
| Rudenko (c), 1996 <sup>31</sup><br>(n=1445)    | <u>Included <math>\alpha</math></u>                                  | <u>Not included: missed in data extraction</u>                       | <u>Not included: unclear motivation <math>\gamma</math></u>                   | Not included: outcome not considered | Not included: outcome not considered |

|                                                   |                                   |                                                    |                                                      |                                         |                                         |
|---------------------------------------------------|-----------------------------------|----------------------------------------------------|------------------------------------------------------|-----------------------------------------|-----------------------------------------|
| Rudenko, (d), 1996 <sup>31</sup><br>(n=1418)      | <u>Included</u> $\alpha$          | <u>Not included: missed<br/>in data extraction</u> | <u>Not included: unclear<br/>motivation</u> $\gamma$ | Not included: outcome not<br>considered | Not included: outcome not<br>considered |
| Rudenko (e), 1996 <sup>31</sup><br>(n=1383)       | <u>Included</u> $\alpha$          | <u>Not included: missed<br/>in data extraction</u> | <u>Not included: unclear<br/>motivation</u> $\gamma$ | Not included: outcome not<br>considered | Not included: outcome not<br>considered |
| Rudenko (f), 1996 <sup>31</sup><br>(n=1424)       | <u>Included</u> $\alpha$          | <u>Not included: missed<br/>in data extraction</u> | <u>Not included: unclear<br/>motivation</u> $\gamma$ | Not included: outcome not<br>considered | Not included: outcome not<br>considered |
| Rudenko (g-rus), 1996 <sup>32</sup><br>(n=66,980) | Not included: Russian<br>language | Included                                           | Included                                             | Not included: outcome not<br>considered | Not included: outcome not<br>considered |
| Grigorieva, 2002 <sup>33</sup><br>(n=2278)        | Not included: Russian<br>language | Included                                           | Included (n=836) $\gamma$                            | Not included: outcome not<br>considered | Not included: outcome not<br>considered |

PIV=Parenteral inactivated vaccine; LAV=Live attenuated vaccine. LCC-C=laboratory-confirmed cases, with culture confirmation only; LCC-S=laboratory-confirmed cases, with culture and/or serological confirmation.

\*

Name of the first author, year of publication, sample included in the analysis. In all meta-analyses, when more than one treatment arm was included into the same study, the study was divided into sub-trials. When the meta-analysis included both LAV and PIV to derive an overall estimate, the placebo group should have been equally split between the sub-trials to avoid the inclusion of placebo data twice or more times. In single meta-analyses, it is thus possible that the total number of a study is different, depending upon the meta-analysis in which it has been included: the entire placebo arm is usually included if the meta-analysis is referred to only one type of vaccine (LAV or PIV), but the placebo arm could (and should) be split by the number of sub-trials if the meta-analysis is referred to both PIV and LAV (however, Negri et al. did not split placebo data and included such data twice or even four times: i.e. Rudenko 1996 c to f). We have reported here the total sample of each trial as the placebo arm was not split. The letters under brackets are referred to the sub-trial and have been assigned by the authors of the first meta-analysis including the study.

§

Only the results on healthy children are here considered.

$\alpha$

**Clover 1991:** LCC – Negri et al. classified this study as reporting “culture-confirmed influenza”, however only a the outcome of study was defined as clinical symptoms with viral isolation or antibody rise. Thus, the outcome should have been classified as LCC-S. CCC – These data were reported in Table 7 and the outcome was not mentioned in the text: it was thus difficult to identify and probably missed by the authors.

**Gruber 1990:** Negri et al. classified this study as reporting “culture-confirmed influenza”, however the outcome of the study was defined as clinical symptoms with viral isolation or antibody rise. Thus, the outcome should have been classified as LCC-S. Manzoli et al. did not identify the outcome LCC for LAV: it was unclearly reported once in the text, with no raw numbers, and not mentioned anymore in the Results, Discussion, and tables.

**Rudenko (c to f) 1996:** Placebo data were included four times in the overall analysis by Negri et al.

$\Omega$

Because the meta-analysis was referred to both LAV and PIV, authors correctly extracted the data splitting the placebo arm into two, avoiding data replication.

$\varepsilon$

Only data for children <72 months have been included.

$\gamma$

**Gruber 1990:** Authors stated that “No efficacy and effectiveness measure was determined for participants in the live vaccine arm”. However, data on the efficacy of LAV are available and have been extracted in other meta-analyses.

**Piedra 1991:** Authors wrote that this study was excluded because “Three studies in one. Two already included (Gruber 1990 and Clover 1991), the third is of uncertain provenience”. However, no details were provided in any part of the paper on what do authors exactly mean with “of uncertain provenience”.

**Tam 2007:** Authors did not state that the study was excluded, but it was. Probably, the exclusion was due to what authors stated in the study description section: “Randomisation and allocation concealment are described very well but inconsistencies in the text (a vanished season), unclear denominators and a real possibility of biased follow up and

reporting bias of safety outcomes make this study at high risk of bias". In particular, authors reported that "Mean age at first vaccination is reported as 23.5 (SD7.4) months which is strange, as if the enrollees are always the same, most of them should have been out of age by the second season".

**Beutner 1979:** Authors only included one of the two groups of PIV vaccinated subjects (excluding the 300 subjects who received the inactivated influenza A vaccine containing the strain X-41 - A/Port Chalmers (H3N2) and a neuraminidase-specific recombinant vaccine of strain X-42, incorporating an equine derived hemagglutinin component – Heq1N2Ch). –

**Grigorieva 2002:** Only the group of subjects receiving two doses of LAV has been included, and the relative placebo arm.

**Rudenko (a to f) 1996:** LCC – Authors did not state that the first year of the study was excluded, but it was. Probably, the exclusion was due to what authors stated in the study description section: "The first epidemic season in Alma Ata was due to the strain A/Taiwan/1/86 (H1N1) and lasted between November 17th and December 21st . Considering that the epidemic began early than expected, it is possible that at this time not all study participants had received the second dose of vaccine or placebo, respectively". CCC – Authors reported that "All children in the Kazakhstan and Cuba studies were included in the trial of vaccine efficacy". However, only the data from Alma-Ata, 1989 (b – defined as "Rudenko 1996a" in the meta-analysis) were included in the analysis, and no reasons for the exclusion of the data from Cuba have been provided.

**Slepushkin 1974:** Authors describe the reasons why the second study reported in the paper was excluded, but did not state why the first study was also excluded from the analysis of efficacy.

**Khan 1996:** Authors excluded CCC data because "Specific diagnosis of influenza refers to an acute respiratory illness occurred during the official influenza season and is a clinical diagnosis, moreover the employed criteria were not uniform and these outcome not used)".

**Clover 1991:** Data were extracted from Table 7. However, the age-classes of the table are different from those used by the authors, and no explanations were provided on how the authors were able to derive the data used for the analysis.

**Online supplemental Figure 1.** Meta-analysis evaluating the efficacy of parenteral inactivated vaccines (PIV) for preventing laboratory-confirmed cases of influenza (LCC-C if cultural confirmation only; LCC-S if cultural and/or serological confirmation) in healthy children. All studies that were considered in at least one meta-analysis have been included, using the least restrictive criteria for outcome definition and sample inclusion criteria.

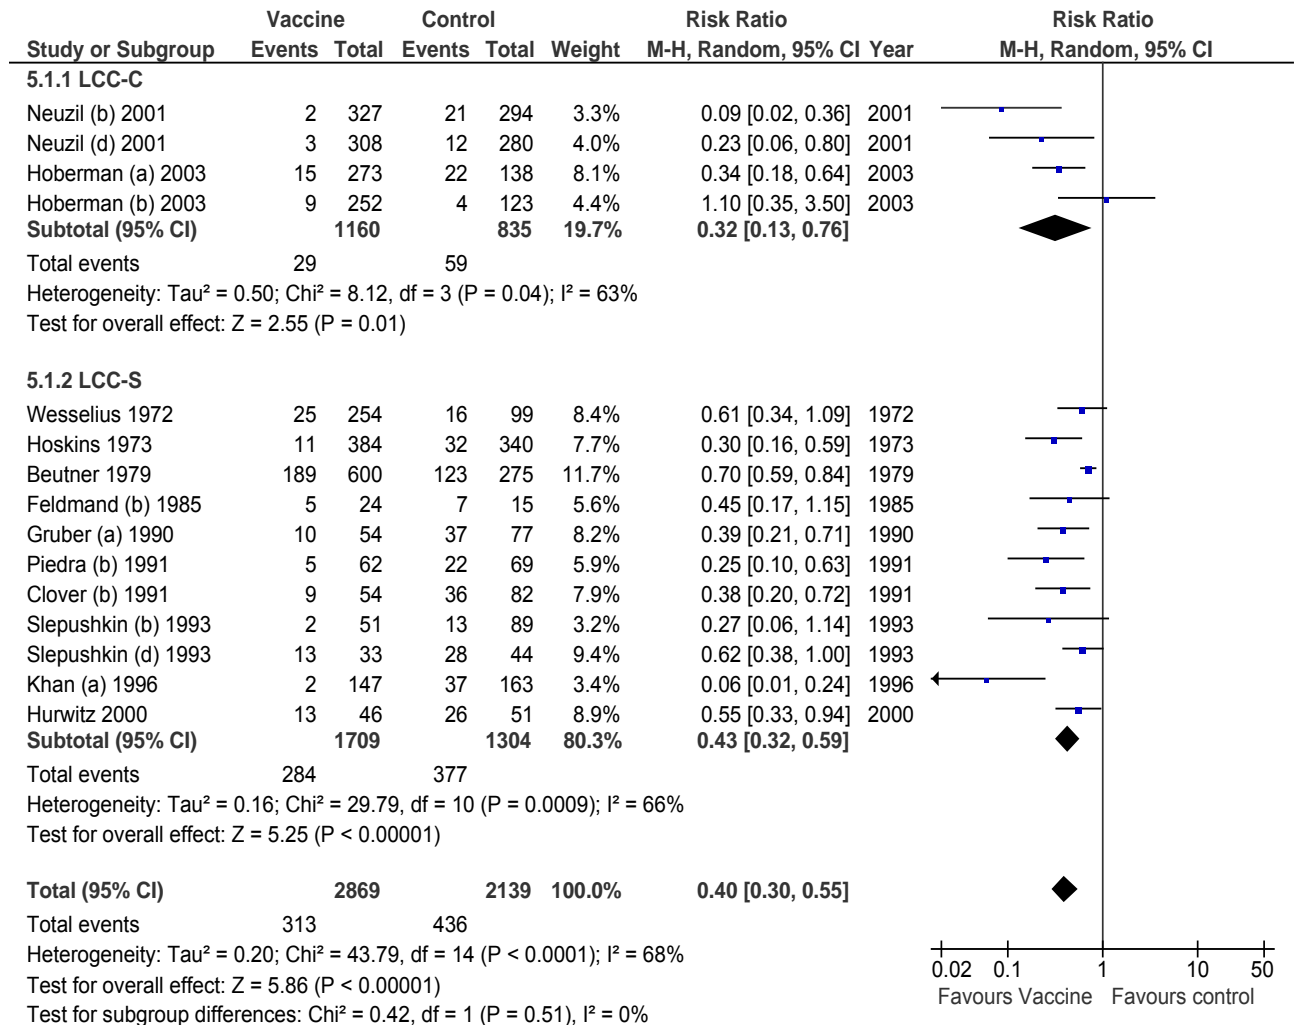

**Online supplemental Figure 2.** Meta-analysis evaluating the efficacy of live attenuated vaccines (LAV) for preventing laboratory-confirmed cases of influenza (LCC-C if cultural confirmation only; LCC-S if cultural and/or serological confirmation) in healthy children. All studies that were considered in at least one meta-analysis have been included, using the least restrictive criteria for outcome definition and sample inclusion criteria.

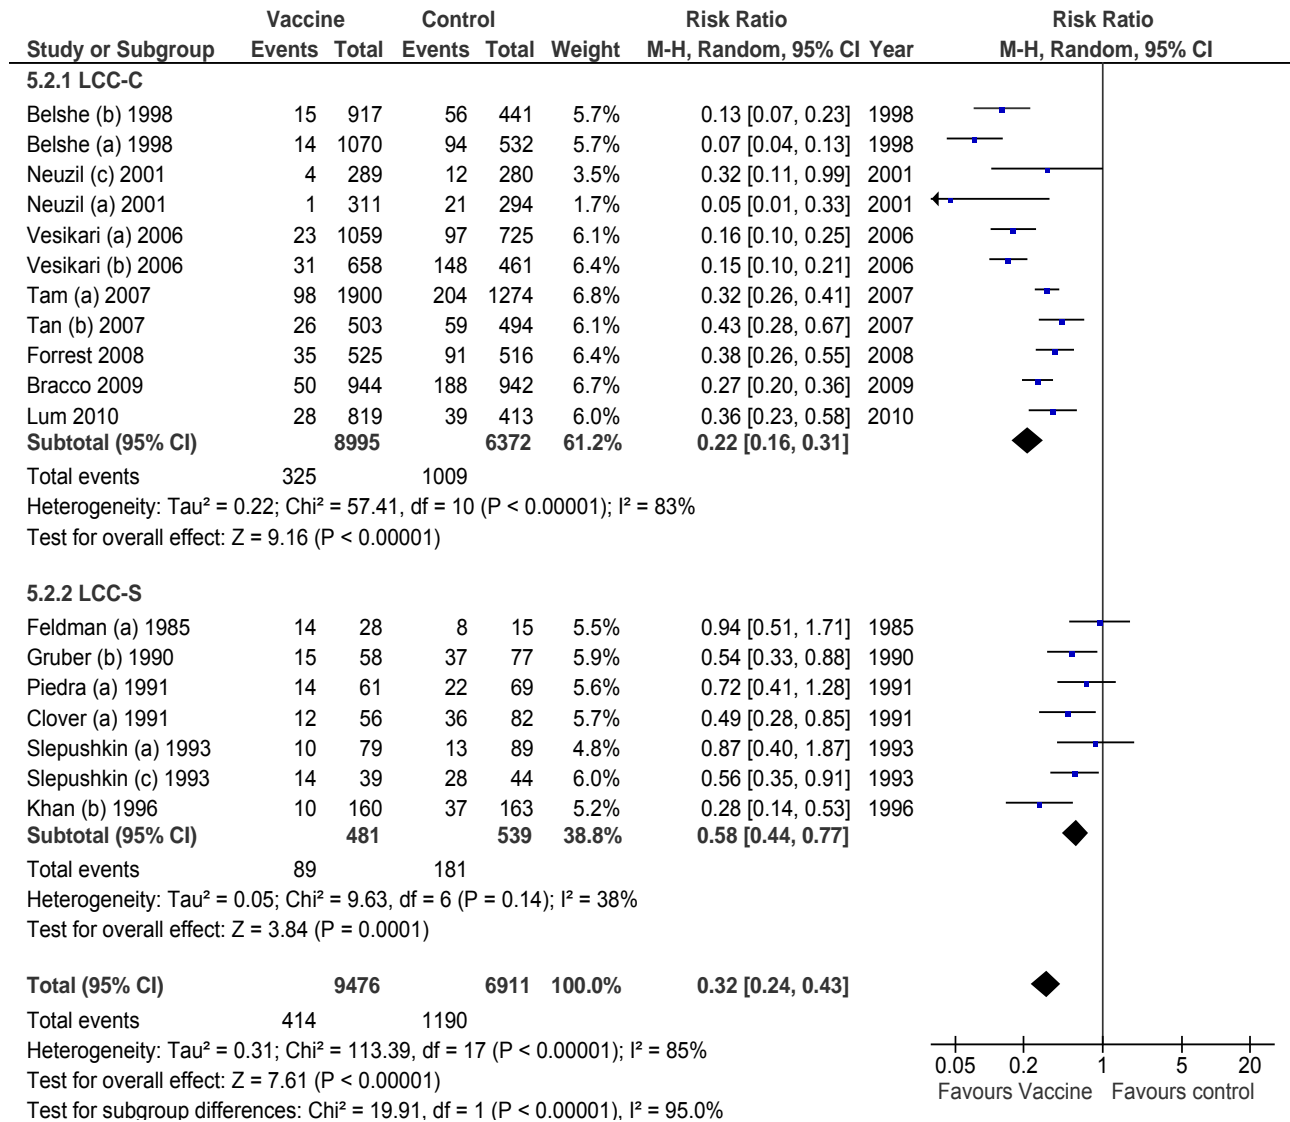



**Online supplemental Figure 3.** Meta-analysis evaluating the efficacy of parenteral inactivated vaccines (PIV) for preventing clinically-confirmed cases of influenza (CCC) in healthy children. All studies that were considered in at least one meta-analysis have been included, using the least restrictive criteria for outcome definition and sample inclusion criteria.

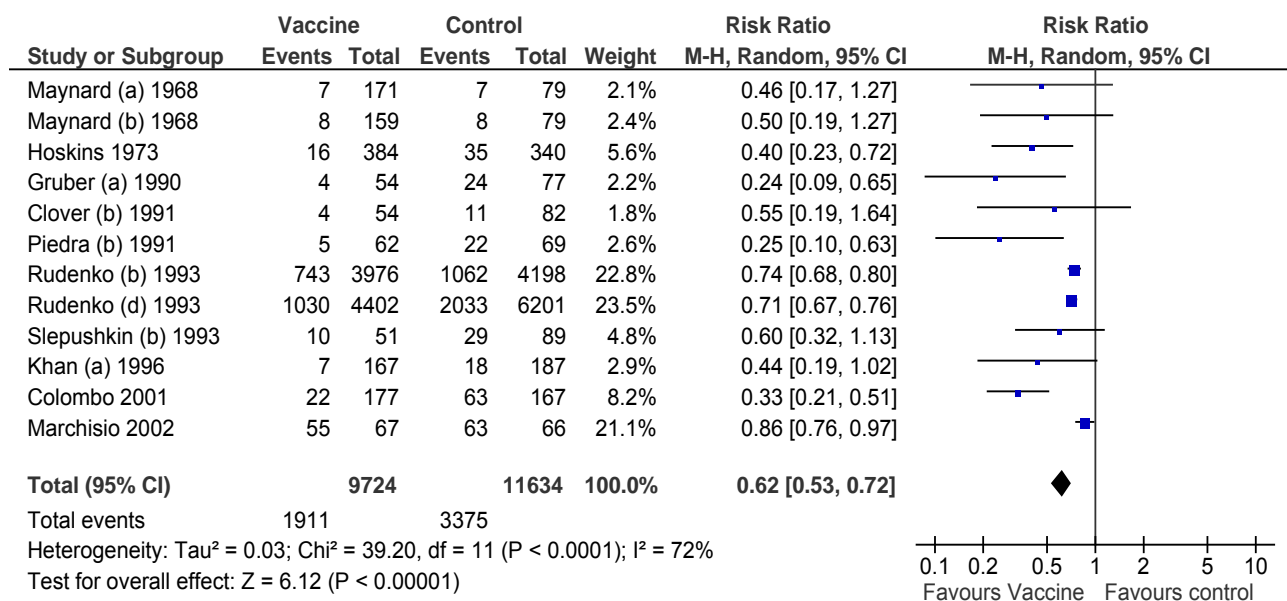

**Online supplemental Figure 4.** Meta-analysis evaluating the efficacy of live-attenuated vaccines (LAV) for preventing clinically-confirmed cases of influenza (CCC) in healthy children. All studies that were considered in at least one meta-analysis have been included, using the least restrictive criteria for outcome definition and sample inclusion criteria.

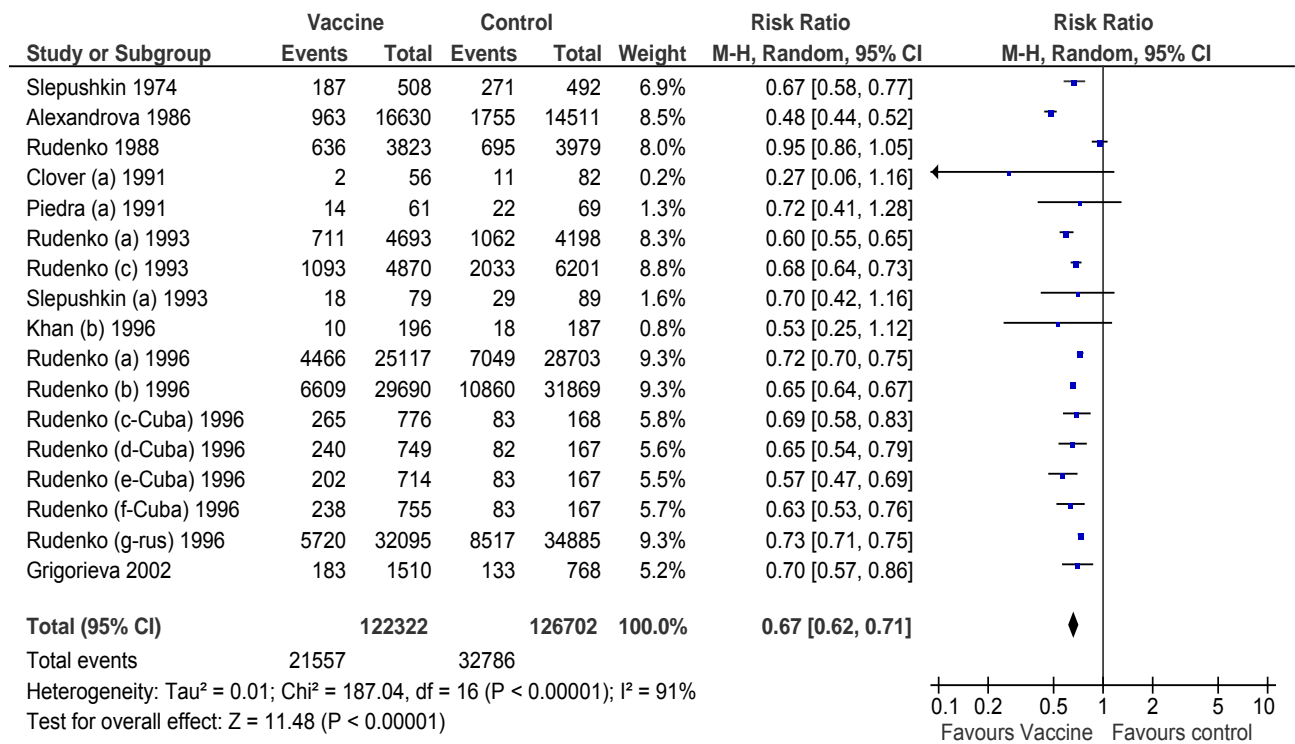

**Online supplemental Figure 5.** Meta-analysis evaluating the efficacy of live-attenuated vaccines (LAV) for preventing laboratory confirmed cases of influenza (LCC) in children aged 6-24 months (6-36 months in Vesikari 2006 and Bracco 2009 studies; 12-36 months in Tam 2007 study; 11-24 months in Lum 2010 study). All studies that were considered in at least one meta-analysis have been included, using the least restrictive criteria for outcome definition and sample inclusion criteria.

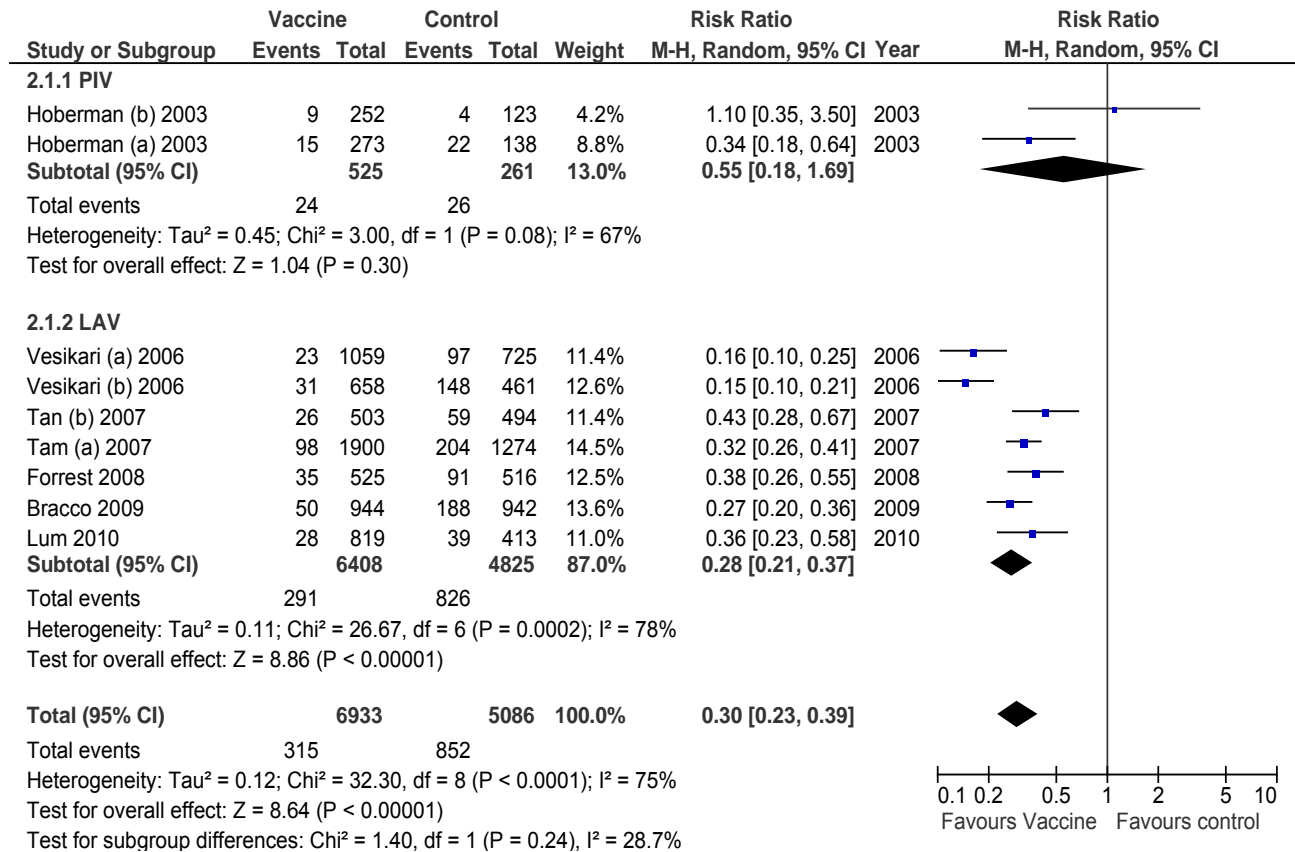

**Online Supplemental Table 2.** Details on the differences between the two meta-analyses evaluating acute otitis media (AOM). Only randomized controlled trials (RCTs) have been considered.

| First author (Ref.)            | Manzoli et al. <sup>2</sup>               | Jefferson et al. <sup>3</sup>                                                     | Reasons for exclusion / Notes                                                                                                                                                                                                                                          |
|--------------------------------|-------------------------------------------|-----------------------------------------------------------------------------------|------------------------------------------------------------------------------------------------------------------------------------------------------------------------------------------------------------------------------------------------------------------------|
| Clements 1995 <sup>34</sup>    | One RCT included                          | Excluded                                                                          | Hepatitis B vaccine as control.                                                                                                                                                                                                                                        |
| Clover 1991 <sup>11</sup>      | Two RCTs included (1 on LAV and 1 on PIV) | Two RCTs included (1 on LAV and 1 on PIV)                                         | Authors extracted different results.                                                                                                                                                                                                                                   |
| Colombo 2001 <sup>26</sup>     | One RCT included                          | Included into a separate meta-analysis for studies with no intervention           | Extracted data agreed.                                                                                                                                                                                                                                                 |
| Piedra 1991 <sup>12</sup>      | Two RCTs included (1 on LAV and 1 on PIV) | Excluded                                                                          | Authors only reported “3 studies in one. Two already included, the third is of uncertain provenance”.                                                                                                                                                                  |
| Belshe 1998 <sup>18</sup>      | Two RCTs included                         | Included only the data from 1997 trial; data of 1996 trial have not been included | No explanation provided for the exclusion of Belshe 1996 trial. Extracted data from 1997 trial agreed.                                                                                                                                                                 |
| Hoberman 2003 <sup>17</sup>    | Two RCTs included                         | Two RCTs included                                                                 | Extracted data agreed.                                                                                                                                                                                                                                                 |
| Alexandrova 1986 <sup>29</sup> | One RCT included                          | Not included                                                                      | Authors reported that “The incidence of influenza-like illness; pneumonia; otitis media... were recorded for 6 months following the 2 <sup>nd</sup> inoculation”. However, study data on AOM were not included in the meta-analyses and no explanations were provided. |
| Vesikari 2006 <sup>19</sup>    | Not included                              | One RCTs included                                                                 | The study was published after the end of the search by Manzoli et al.                                                                                                                                                                                                  |

**Online Supplemental Table 3.** Serious adverse events (SAEs) and vaccine-related (VR) SAEs extracted from the meta-analysis by Jefferson et al. <sup>3</sup> on healthy children. Randomized controlled trials (RCTs) and observational studies.

| First author (Ref.)                      | Adverse event                               | n-Vac | N-Vac  | n-Ctrl | N-Ctrl |
|------------------------------------------|---------------------------------------------|-------|--------|--------|--------|
| <i>RCTs on LAV</i>                       |                                             |       |        |        |        |
| Belshe 1998 <sup>18</sup>                | VR-SAEs                                     | 0     | 1070   | 0      | 532    |
| Rudenko 1996 II <sup>32</sup>            | Heart disease                               | 1     | 1224   | 0      | 1191   |
| Rudenko 1996 II (2nd year) <sup>32</sup> | Kidney disease                              | 2     | 220    | 0      | 195    |
| <i>RCTs on PIV</i>                       |                                             |       |        |        |        |
| Vasilyeva 1998a <sup>35</sup>            | Stomach, kidney or Nervous system illnesses | 10    | 11,771 | 4      | 3493   |
| <i>Cohort studies</i>                    |                                             |       |        |        |        |
| Valilyeva 1998b * <sup>36</sup>          | Hospitalization                             | 5     | 5074   | 0      | 2135   |
| Elshina 2000 <sup>37</sup>               | Cardiovascular illnesses                    | 5     | 930    | 3      | 905    |
| Total                                    | SAEs                                        | 23    | 20,289 | 7      | 8451   |

LAV = Live attenuated vaccines; PIV = Parenteral inactivated vaccines. Vac = Vaccinated; Ctrl = Controls. n=cases; N=total sample. \* 5 hospitalization in the intervention group were recorded after the first dose; 1 after the second dose. Because no data were available on both doses, we extracted only the largest value.

**Online supplemental Table 4.** Main criticisms to USSR studies included in the meta-analysis on the efficacy and safety of influenza vaccine for healthy children by Jefferson et al. <sup>3</sup>.

| <b>First Author (Ref.)</b>     | <b>Main criticisms by Jefferson et al. <sup>3</sup></b>                                                                                                                                                                                                                                                                                                                                                                                                                                                                                                                                                                                                                                                                                                                                                                                                                                                                                                                                                                                                                                                                                                                                                             |
|--------------------------------|---------------------------------------------------------------------------------------------------------------------------------------------------------------------------------------------------------------------------------------------------------------------------------------------------------------------------------------------------------------------------------------------------------------------------------------------------------------------------------------------------------------------------------------------------------------------------------------------------------------------------------------------------------------------------------------------------------------------------------------------------------------------------------------------------------------------------------------------------------------------------------------------------------------------------------------------------------------------------------------------------------------------------------------------------------------------------------------------------------------------------------------------------------------------------------------------------------------------|
| Aksenov 1971 <sup>38</sup>     | The trial is reasonably reported but there probably is selection bias in serological testing.                                                                                                                                                                                                                                                                                                                                                                                                                                                                                                                                                                                                                                                                                                                                                                                                                                                                                                                                                                                                                                                                                                                       |
| Alexandrova 1986 <sup>29</sup> | There are three studies reported in this paper. The first is a phase 2, 5-day reactogenicity and safety trial carried out in 284 placebo recipients and 173 vaccine recipients. Although it claims randomisation it is unclear why the imbalance in numbers and because of the unclear text describing what went on I have classified it as C-RCT. As the denominators are different in all three studies and there is no way to understand what went on, it is very difficult to classify study design.                                                                                                                                                                                                                                                                                                                                                                                                                                                                                                                                                                                                                                                                                                            |
| Bashliaeva 1986 <sup>39</sup>  | Placebo-controlled cohort study (does not state whether children were randomly assigned to groups following division by age and school conditions) carried out in two regions of the then USSR during the 1983-1984 season among schoolchildren.<br>Serology<br>There are two apparently contradictory statements concerning serology and partly safety assessment. "The reactogenicity and antigenic activity of the vaccine were studied by observing the 305 vaccinated children and the 237 children who had received the placebo in 15 schools. They were assessed according to a series of well known indices, characterising the frequency and intensiveness of the local and general reactions to the vaccination" and "in order to study the antigenic activity of 'Grippovac SE-AZH', 320 samples of serum were taken from the inoculated children before vaccination, 280 samples were taken 21 days after the first injection and 170 samples were taken 21 days after the second injection". The reasons for his apparent attrition are unclear.<br>Notes<br>This was a very difficult text to follow with many inconsistencies. Allocation and blinding are not described denominators are not clear. |
| Burtseva 1991 <sup>40</sup>    | The authors conclude that BIV had better performance (they report protection indices), but the text has so many contradictions, lacks clarity and mentions exclusion of influenza B cases from the analysis that it is impossible to understand what went on. Children from 'internat' roughly translates as state orphanage, could be ethical issues surrounding consent.                                                                                                                                                                                                                                                                                                                                                                                                                                                                                                                                                                                                                                                                                                                                                                                                                                          |
| Chumakov 1987 <sup>41</sup>    | Prospective cohort study, re-analysis of data from Bashliaeva 1986.<br>Claim figures for numbers of children inoculated in Bashlyaeva 86 are wrong caused by error in calculation and designation of groups. Bashlyaeva 86 did not report that 411 inoculated children were eliminated from the observations for various reasons and should be excluded from the analysis.                                                                                                                                                                                                                                                                                                                                                                                                                                                                                                                                                                                                                                                                                                                                                                                                                                          |
| Desheva 2002 <sup>42</sup>     | The authors conclude that the vaccine is safe and effective. I do not think the data support this conclusion as for example the vaccine does not prevent against bronchitis. No viral circulation in community is described.                                                                                                                                                                                                                                                                                                                                                                                                                                                                                                                                                                                                                                                                                                                                                                                                                                                                                                                                                                                        |
| El'shina 2000 <sup>37</sup>    | The authors conclude that Grippol is safe and effective and recommend immunisation of children. The extensive contradictions between text and figures, unexplained selective serological testing and vaccination make this a high risk of bias study.<br>Figure for serologically confirmed is 60.4% of calculated per 1000 figure for number with influenza and ARI. Therefore serological confirmation is an estimate not an absolute figure and it may not be appropriate to include in meta-analysis of serologically confirmed influenza.<br>Tables show period of seasonal rise from 07/97 to 04/98, likely to be mistake.                                                                                                                                                                                                                                                                                                                                                                                                                                                                                                                                                                                    |
| Grigor'eva 1994 <sup>43</sup>  | Poor reporting (no description of blinding, placebo content and aspect, attrition etc.) and likely selection bias of safety and immunological samples.                                                                                                                                                                                                                                                                                                                                                                                                                                                                                                                                                                                                                                                                                                                                                                                                                                                                                                                                                                                                                                                              |
| Grigor'eva 2002 <sup>33</sup>  | Possibly biased subset of influenza cases in follow-up. Means of selection of them and of children to assess antibody responses not described.                                                                                                                                                                                                                                                                                                                                                                                                                                                                                                                                                                                                                                                                                                                                                                                                                                                                                                                                                                                                                                                                      |

|                                    |                                                                                                                                                                                                                                                                                                                                                                                                                                                                                                                                                                                                                                                                                                                                                                                                                                                                                                                                                                                                                                                                                                                                                                                                                                                                                                                                                                                                                                                                                                                                                                                                                                                                                                                                                                                                                       |
|------------------------------------|-----------------------------------------------------------------------------------------------------------------------------------------------------------------------------------------------------------------------------------------------------------------------------------------------------------------------------------------------------------------------------------------------------------------------------------------------------------------------------------------------------------------------------------------------------------------------------------------------------------------------------------------------------------------------------------------------------------------------------------------------------------------------------------------------------------------------------------------------------------------------------------------------------------------------------------------------------------------------------------------------------------------------------------------------------------------------------------------------------------------------------------------------------------------------------------------------------------------------------------------------------------------------------------------------------------------------------------------------------------------------------------------------------------------------------------------------------------------------------------------------------------------------------------------------------------------------------------------------------------------------------------------------------------------------------------------------------------------------------------------------------------------------------------------------------------------------|
| Khan 1996 <sup>14</sup>            | <p>Outcomes-Effectiveness: Specific diagnosis of influenza refers to an acute respiratory illness occurred during the official influenza season and is a clinical diagnosis, moreover the employed criteria were not uniform and these outcome not used.</p> <p>Outcomes-Safety: Some harms are reported with insufficient information for extraction (coryza and sore throat).</p> <p>The authors report ILI and assume it to be influenza because of the background rate. The text is also contradictory because half the participants are supposed to have had serology carried out on a non random basis but the middle line of Table 2 (reporting more than 4 fold titre rise) appears to indicate that school absentees had titres done and lumps absences with titre rises under "both" with a calculation of vaccine efficacy.</p> <p>The two placebos are not reported separately, so it is impossible to assess safety apart from what is in the text at page 173 right hand column.</p> <p>Denominators do not match between tables and text and the only mention of attrition is the statement that medical card for 5 of the 555 participants were not received.</p>                                                                                                                                                                                                                                                                                                                                                                                                                                                                                                                                                                                                                                     |
| Obrosova-Serova 1990 <sup>44</sup> | There was lot of unexplained attrition between the first and second inoculations.                                                                                                                                                                                                                                                                                                                                                                                                                                                                                                                                                                                                                                                                                                                                                                                                                                                                                                                                                                                                                                                                                                                                                                                                                                                                                                                                                                                                                                                                                                                                                                                                                                                                                                                                     |
| Rudenko 1988 <sup>30</sup>         | <p>Serological: The basis for the sampling is not described.</p> <p>Safety: It is unclear on what basis the children in the samples were selected. The only outcome reported by arm was fever of various degrees but no definition is given.</p> <p>No description of the vaccine content and unclear randomisation and attrition/sampling make the interpretation of the results very difficult.</p>                                                                                                                                                                                                                                                                                                                                                                                                                                                                                                                                                                                                                                                                                                                                                                                                                                                                                                                                                                                                                                                                                                                                                                                                                                                                                                                                                                                                                 |
| Rudenko 1993a <sup>25</sup>        | <p>Randomisation units were schools and results were presented both at cluster (which is right) and individual (which is wrong) levels. How this affects results is impossible to say as no cluster coefficients are reported.</p> <p>Second year study had no intramuscular placebo. This unblinding could have had some effect if different schools were in communication, and data have not been extracted. No separate reporting of spray and subcutaneous placebo for first year.</p> <p>Data from the pilot reactogenicity cohort (?) study not extracted as provenance and allocation of participants is not clear.</p>                                                                                                                                                                                                                                                                                                                                                                                                                                                                                                                                                                                                                                                                                                                                                                                                                                                                                                                                                                                                                                                                                                                                                                                        |
| Rudenko 1996a <sup>31</sup>        | <p>Safety: Data about children, who were immunised for three successive years are reported but have not been extracted as it is unclear which year, which vaccine and most of all how to reconcile massive differences in denominators (for example for year 1, data for a total of 262 children only are reported).</p> <p>Febrile reactions and somatic and infectious diseases: To what group or groups belong the children? It is not possible to take back these data with the vaccination plan in table 1.</p> <p>Influenza and acute respiratory diseases in Havana: Arms in table 8 are not conform to the original randomised arms. Of how many arms consist the Havana trial? Were vaccination carried out in two years or were all subjects immunised in November 1990?</p> <p>Efficacy data consider a study population aged between 5 and 14. Individuals aged 3 or 4 were apparently not included. Number of children, who received placebo and polivaccine in table 8 coincide with those showed in the trial Havana 1991 in table 1 but the other are inconsistent.</p> <p>Influenza-like diseases in Alma Ata: Follow-up was probably carried out during the epidemics.</p> <p>Alma Ata 1986 - 87: From table 1 the number of placebo recipients aged 7-14 is 18164. From table 7 results that 22.963 recipients received vaccine. Could these two number be erroneously inverted? (and 4799 of the original 22963 vaccinated excluded).</p> <p>Any subject excluded from the safety analysis of 1988-89?</p> <p>What about effectiveness of influenza immunisation in Kalinigrad? Chaotic inconsistent reporting. No attempt at reconciling viral circulation and seroconversion rates with clinical symptoms so it is impossible to assess how many of the ILI episodes are in fact influenza.</p> |
| Slepushkin 1974 <sup>28</sup>      | <p>Participants: Although the text states that "Three equal groups of healthy children were formed at random" the tables report 571 and 552 children in the vaccine and "unvaccinated" groups respectively. It could be that the 3 arm trial is different from the trial undertaken in January 1971, but the text is very confusing. There may even be a fourth study with again 3 arms.</p> <p>Outcomes:</p> <ul style="list-style-type: none"> <li>- Raised temperature up to 37.5 °C, number of days after vaccination not defined</li> <li>- Raised temperature &gt; 37.5 °C, number of days after vaccination not defined</li> <li>- Emergency prevention of illness in first 15 days after vaccination (data not extracted, confounders, some children must have been sick over period of administration of 3 doses of vaccine, also no placebo arm carried out).</li> </ul> <p>The text is so confusing that only the data from the tables have been extracted. However, I am not sure of its relationship with the text.</p>                                                                                                                                                                                                                                                                                                                                                                                                                                                                                                                                                                                                                                                                                                                                                                                  |

---

|                                |                                                                                                                                                                                                                                                                                                                                                                                                                                                                                                                                                                                                                                                                                                                                                                                                                                                                                                                                                                                                                                                                                                                                                                                                                                                                                                                                                                                                                                                                                                                                                                                                                                                                                                                                                                                                                                                                                                         |
|--------------------------------|---------------------------------------------------------------------------------------------------------------------------------------------------------------------------------------------------------------------------------------------------------------------------------------------------------------------------------------------------------------------------------------------------------------------------------------------------------------------------------------------------------------------------------------------------------------------------------------------------------------------------------------------------------------------------------------------------------------------------------------------------------------------------------------------------------------------------------------------------------------------------------------------------------------------------------------------------------------------------------------------------------------------------------------------------------------------------------------------------------------------------------------------------------------------------------------------------------------------------------------------------------------------------------------------------------------------------------------------------------------------------------------------------------------------------------------------------------------------------------------------------------------------------------------------------------------------------------------------------------------------------------------------------------------------------------------------------------------------------------------------------------------------------------------------------------------------------------------------------------------------------------------------------------|
| Slepushkin 1988 <sup>45</sup>  | Poorly conducted study: de facto unblinded, with unexplained attrition. Physical aspect of placebo and vaccine in coded vials was different making blinding inadequate. There is a strange sub-analysis of respiratory symptoms classified as harms by arm after the first vaccination dose. The authors carried out nasal swabs in 10 children and found that 1 had tonsillitis and 5 had adenovirus rhinitis. Although the breakdown by arm of these is not reported as this is a RCT, what surely matters is the difference in event between arms, even for harms. This leads me to suspect that the authors did not trust their own random allocation.                                                                                                                                                                                                                                                                                                                                                                                                                                                                                                                                                                                                                                                                                                                                                                                                                                                                                                                                                                                                                                                                                                                                                                                                                                              |
| Slepushkin 1991 <sup>46</sup>  | Randomisation and attrition are not explained.<br>The authors checked harm data against seroconversion, to ensure that for example temp was not associated with seroconversion i.e. with infection. Unfortunately no effectiveness data are reported.<br>Follow-up not described.<br>Problem with data collection and surveillance in school 2. In the 1993 paper the authors report efficacy as 13% (P=0.82) for two doses of CA and 73% (P=0.08) for one dose of BIV. This relates to school 1. They also report an efficacy estimate for school 2 but this is likely to be highly unreliable.                                                                                                                                                                                                                                                                                                                                                                                                                                                                                                                                                                                                                                                                                                                                                                                                                                                                                                                                                                                                                                                                                                                                                                                                                                                                                                        |
| Slepushkin 1994 <sup>47</sup>  | Interventions: There is no placebo arm reported in the third year, which is strange as there is a placebo arm reported for immunogenicity in table 2 (??). For the second year there is also a mysterious second inactivated vaccine which appears in the results tables - data not extracted. The authors do not draw clear conclusions and it is difficult to understand to what the purpose of the study was. Badly reported no clear overall denominator and safety data is reported for limited groups of participants with no clear sampling rule.                                                                                                                                                                                                                                                                                                                                                                                                                                                                                                                                                                                                                                                                                                                                                                                                                                                                                                                                                                                                                                                                                                                                                                                                                                                                                                                                                |
| Slobodniuk 2002a <sup>48</sup> | The study is very difficult to interpret, there is no information on participants, community, matching, viral circulation disparity between paired sera and enrollees etc.                                                                                                                                                                                                                                                                                                                                                                                                                                                                                                                                                                                                                                                                                                                                                                                                                                                                                                                                                                                                                                                                                                                                                                                                                                                                                                                                                                                                                                                                                                                                                                                                                                                                                                                              |
| Vasil'eva 1982 <sup>49</sup>   | Methods: The setting, season and viral circulation are not described.<br>Participants: 335 children of unknown provenance.<br>Interventions: Placebo is not described.<br>Outcomes Serological: Paired sera taken in a non-described fashion.<br>Outcomes Effectiveness: Breakdown by age groups and type of injection is not reported.<br>There is no description of randomisation, allocation or attrition.                                                                                                                                                                                                                                                                                                                                                                                                                                                                                                                                                                                                                                                                                                                                                                                                                                                                                                                                                                                                                                                                                                                                                                                                                                                                                                                                                                                                                                                                                           |
| Vasil'eva 1988a <sup>35</sup>  | Unclear rationale for subgroup sampling and sketchy description of methods. Much may have been lost in translation.                                                                                                                                                                                                                                                                                                                                                                                                                                                                                                                                                                                                                                                                                                                                                                                                                                                                                                                                                                                                                                                                                                                                                                                                                                                                                                                                                                                                                                                                                                                                                                                                                                                                                                                                                                                     |
| Vasil'eva 1988b <sup>36</sup>  | Methods: Randomisation is described only to say that older children ("adolescents") were drawn individually into the randomization sequence whereas children aged 11-14 were selected on the basis of their class. It is unclear whether this means cluster randomization although denominators are roughly on a 3:1 basis.<br>Outcomes- Safety: The basis for the sampling is unclear and it is not at all clear whether this is a random sample (data not extracted). Earlier in the report, the text reports "When the groups were formed, with the aim of evaluating the preparations' reactogenic properties and antigenic activity, the units of selection were individuals" (??).<br>The outcomes reported in this analysis (Table 3) are very unusual (allergies, bronchitis, neuralgia, carbuncles, stomach ulcers etc.) and there is gross imbalance and inconsistencies in the denominators of the arms (centrifugal 6625, adsorptive 491, chromatographic 4655, placebo 3493 =15264).<br>Notes: I am not happy about the large number of inconsistencies in the text and non random (or at least unexplained) sampling carried out. Terrible reporting leading to wicked loss of data. I have trying extracting data for influenza from the effectiveness text assuming a denominator of 6596 for all vaccinees and 3393 for placebo, converting percentages from the text as follows for influenza A (H1N1) 18.2%/ of those inoculated with the chromatographic preparation (4655 i.e. 847), 24.2% of those inoculated with the centrifugal (6625) preparation and 37.9% (i.e. 1603) of children in the control groups (3393, not 3493 as it says in Table 3, i.e. 1286). As the summed denominators exceed the denominator reported CDP needs to check). However these numerators do not match even remotely the 198 paired sera taken for influenza diagnosis. Too many inconsistencies. |

---



**Online supplemental Table 5.** List of the randomized controlled trials included in the meta-analyses on the efficacy of influenza vaccine for healthy adults – Laboratory-confirmed cases of influenza. The studies for which there may be some discrepancy between meta-analysis inclusion criteria and extracted data (or data exclusion) are underlined.

|                                                                                                                                  | Villari et al. <sup>50</sup>                                                                 | Jefferson et al. <sup>51</sup>                      | Osterholm et al. <sup>5</sup>                                                                                                                      |
|----------------------------------------------------------------------------------------------------------------------------------|----------------------------------------------------------------------------------------------|-----------------------------------------------------|----------------------------------------------------------------------------------------------------------------------------------------------------|
| End date of the search (mm/yy)                                                                                                   | 12/2002                                                                                      | 06/2010                                             | 02/2011                                                                                                                                            |
| Participant's age-range (years)                                                                                                  | 15-65                                                                                        | 16-65                                               | All ages §                                                                                                                                         |
| Study inclusion criteria for RCTs (all meta-analyses only included studies assessing wild-strain naturally-occurring infections) | - Published in English<br>- At least 70% of healthy individuals aged between 15 and 65 years | - At least 75% of participants within the age range | - Vaccines licensed in USA after 1966 for LAV and 1975 for PIV<br>- RT-PCR or culture-confirmed influenza cases as outcome<br>- Indexed in Medline |
| Study exclusion criteria                                                                                                         | - Control group receiving no intervention                                                    | - Control group receiving another influenza vaccine | - Control group receiving another influenza vaccine or no intervention                                                                             |

#### Laboratory-confirmed cases

##### Individual datasets on PIV\*

|                                              |                                                                       |                                                    |                                      |
|----------------------------------------------|-----------------------------------------------------------------------|----------------------------------------------------|--------------------------------------|
| Mogabgab (a), 1970 <sup>52</sup><br>(n=1402) | Not included: outcome based on a sub-sample (incorrect randomization) | Included – LCC-S                                   | Not included: date                   |
| Mogabgab (b), 1970 <sup>52</sup><br>(n=1551) | Not included: outcome based on a sub-sample (incorrect randomization) | Included – LCC-S                                   | Not included: date                   |
| Leibovitz, 1971 <sup>53</sup><br>(n=9616)    | Not included: control group receiving no intervention                 | Included – LCC-S                                   | Not included: date                   |
| Hoskins, 1973 <sup>7</sup><br>(n=724)        | Included – LCC-S                                                      | Not included: influenza B vaccine as control       | Not included: date                   |
| Mair (a), 1974 <sup>54</sup><br>(n=247)      | Included – LCC-S                                                      | Not included: influenza B vaccine as control       | Not included: date                   |
| Mair (b), 1974 <sup>54</sup><br>(n=218)      | Included – LCC-S                                                      | Not included: influenza B vaccine as control       | Not included: date                   |
| Hammond, 1978 <sup>55</sup><br>(n=225)       | Included – LCC-S                                                      | Included – LCC-S                                   | Not included: vaccine type           |
| Tannock, 1984 <sup>56</sup><br>(n=57)        | Included – LCC-S                                                      | Included – LCC-S                                   | Not included: vaccine type           |
| Couch (b), 1986 <sup>57</sup><br>(n=180)     | Included – LCC-S                                                      | <u>Not included: probably missed in the search</u> | Not included: not indexed in Medline |

|                                             |                                                                                        |                                                              |                                                           |
|---------------------------------------------|----------------------------------------------------------------------------------------|--------------------------------------------------------------|-----------------------------------------------------------|
| Keitel (a), 1988 <sup>58</sup><br>(n=598)   | Included - LCC-S (authors used a different reference as the study was published twice) | Included – LCC-S                                             | Not included: mixed cultural and serological confirmation |
| Keitel (b), 1988 <sup>58</sup><br>(n=697)   | Included - LCC-S (authors used a different reference as the study was published twice) | Included – LCC-S                                             | Not included: mixed cultural and serological confirmation |
| Edwards (e), 1994 <sup>59</sup><br>(n=1756) | Included – LCC-S (n=1317) <sup>Ω</sup>                                                 | Not included: influenza B vaccine as control                 | Not included: influenza B vaccine as control              |
| Edwards (f), 1994 <sup>59</sup><br>(n=2124) | Included – LCC-S (n=1592) <sup>Ω</sup>                                                 | Not included: influenza B vaccine as control                 | Not included: influenza B vaccine as control              |
| Edwards (g), 1994 <sup>59</sup><br>(n=2251) | Included – LCC-S (n=1689) <sup>Ω</sup>                                                 | Not included: influenza B vaccine as control                 | Not included: influenza B vaccine as control              |
| Edwards (h), 1994 <sup>59</sup><br>(n=2032) | Included – LCC-S (n=1524) <sup>Ω</sup>                                                 | Not included: influenza B vaccine as control                 | Not included: influenza B vaccine as control              |
| Powers (a), 1995 <sup>60</sup><br>(n=34)    | Included – LCC-S (studies were split differently in sub-trials but data coincide)      | Included – LCC-S                                             | Not included: mixed cultural and serological confirmation |
| Powers (b), 1995 <sup>60</sup><br>(n=34)    | Included – LCC-S (studies were split differently in sub-trials but data coincide)      | Included – LCC-S                                             | Not included: mixed cultural and serological confirmation |
| Powers (c), 1995 <sup>60</sup><br>(n=59)    | Included – LCC-S (studies were split differently in sub-trials but data coincide)      | Included – LCC-S                                             | Not included: mixed cultural and serological confirmation |
| Keitel (a), 1997 <sup>61</sup><br>(n=830)   | Included – LCC-S                                                                       | Included – LCC-S<br>(different outcome extracted $\gamma$ )  | Not included: mixed cultural and serological confirmation |
| Keitel (b), 1997 <sup>61</sup><br>(n=940)   | Included – LCC-S                                                                       | Included – LCC-S<br>(different outcome extracted $\gamma$ )  | Not included: mixed cultural and serological confirmation |
| Keitel (c), 1997 <sup>61</sup><br>(n=934)   | Included – LCC-S                                                                       | Included – LCC-S<br>(different outcome extracted $\gamma$ )  | Not included: mixed cultural and serological confirmation |
| Wilde, 1999 <sup>62</sup><br>(n=359)        | Included – LCC-S                                                                       | Not included: pneumococcal vaccine as control                | Not included: mixed cultural and serological confirmation |
| Bridges (a), 2000 <sup>63</sup><br>(n=275)  | Not included: outcome based on a sub-sample (incorrect randomization)                  | Included – LCC-S                                             | Not included: mixed cultural and serological confirmation |
| Bridges (b), 2000 <sup>63</sup><br>(n=278)  | Not included: outcome based on a sub-sample (incorrect randomization)                  | Included – LCC-S                                             | Not included: mixed cultural and serological confirmation |
| Ohmit, 2006 <sup>64</sup><br>(n=728)        | Not included: date                                                                     | <u>Not included: uncertain reasons <math>\gamma</math></u>   | Included – LCC-C                                          |
| Ohmit, 2008 <sup>65</sup><br>(n=1205)       | Not included: date                                                                     | <u>Not included: uncertain reasons <math>\gamma</math></u>   | Included – LCC-C                                          |
| Beran (a), 2009 <sup>66</sup><br>(n=6203)   | Not included: date                                                                     | Included – LCC-C (n=6143 due to an error in data extraction) | Included – LCC-C                                          |

|                                             |                                                          |                                                            |                                                           |
|---------------------------------------------|----------------------------------------------------------|------------------------------------------------------------|-----------------------------------------------------------|
| Beran (b), 2009 <sup>67</sup><br>(n=7652)   | Not included: date                                       | Included – LCC-C $\gamma$                                  | Included – LCC-C $\gamma$                                 |
| Monto, 2009 <sup>68</sup><br>(n=1138)       | Not included: date                                       | <u>Not included: uncertain reasons <math>\gamma</math></u> | Included – LCC-C                                          |
| Frey, 2010 <sup>69</sup><br>(n=7481)        | Not included: date                                       | Not included: date                                         | Included – LCC-C                                          |
| Jackson (a), 2010 <sup>70</sup><br>(n=3431) | Not included: date                                       | <u>Not included: probably missed in the search</u>         | Included – LCC-C                                          |
| Jackson (b), 2010 <sup>70</sup><br>(n=4054) | Not included: date                                       | <u>Not included: probably missed in the search</u>         | Included – LCC-C                                          |
| <u>Individual datasets on LAV*</u>          |                                                          |                                                            |                                                           |
| Rytel, 1977 <sup>71</sup><br>(n=143)        | Included – LCC-S                                         | Included – LCC-S                                           | Not included: mixed cultural and serological confirmation |
| Monto, 1982 <sup>72</sup><br>(n=284)        | Included – LCC-S                                         | Included – LCC-S                                           | Not included: outcome only based on serology              |
| Couch (a), 1986 <sup>57</sup><br>(n=179)    | Included – LCC-S                                         | <u>Not included: probably missed in the search</u>         | Not included: not indexed in Medline                      |
| Edwards (a), 1994 <sup>59</sup><br>(n=1750) | Included – LCC-S (n=1311) <sup><math>\Omega</math></sup> | Included – LCC-C<br>(different data extracted $\gamma$ )   | Not included: placebo was an influenza vaccine            |
| Edwards (b), 1994 <sup>59</sup><br>(n=2093) | Included – LCC-S (n=1561) <sup><math>\Omega</math></sup> | Included – LCC-C<br>(different data extracted $\gamma$ )   | Not included: placebo was an influenza vaccine            |
| Edwards (c), 1994 <sup>59</sup><br>(n=2239) | Included – LCC-S (n=1676) <sup><math>\Omega</math></sup> | Included – LCC-C<br>(different data extracted $\gamma$ )   | Not included: placebo was an influenza vaccine            |
| Edwards (d), 1994 <sup>59</sup><br>(n=2015) | Included – LCC-S (n=1507) <sup><math>\Omega</math></sup> | Included – LCC-C<br>(different data extracted $\gamma$ )   | Not included: placebo was an influenza vaccine            |
| Ohmit, 2006 <sup>64</sup><br>(n=725)        | Not included: date                                       | <u>Not included: uncertain reasons <math>\gamma</math></u> | Included – LCC-C                                          |
| Ohmit, 2008 <sup>65</sup><br>(n=1191)       | Not included: date                                       | <u>Not included: uncertain reasons <math>\gamma</math></u> | Included – LCC-C                                          |
| Monto, 2009 <sup>68</sup><br>(n=1138)       | Not included: date                                       | <u>Not included: uncertain reasons <math>\gamma</math></u> | Included – LCC-C                                          |

### **Clinically-confirmed cases**

#### Individual datasets on PIV\*

|                                              |                                                 |                                                                    |                                      |
|----------------------------------------------|-------------------------------------------------|--------------------------------------------------------------------|--------------------------------------|
| Maynard (a), 1968 <sup>24</sup><br>(n=250)   | Included                                        | Not included: influenza B vaccine as control                       | Not included: outcome not considered |
| Maynard (b), 1968 <sup>24</sup><br>(n=238)   | Included                                        | Not included: influenza B vaccine as control                       | Not included: outcome not considered |
| Waldman (f), 1969 <sup>73</sup><br>(n=120)   | Included                                        | <u>Not included: uncertain reasons <math>\gamma</math></u>         | Not included: outcome not considered |
| Waldman (h), 1969 <sup>73</sup><br>(n=28)    | Included                                        | <u>Not included: uncertain reasons <math>\gamma</math></u>         | Not included: outcome not considered |
| Waldman (a), 1969 <sup>74</sup><br>(n=583)   | Included (n=524) <sup><math>\Omega</math></sup> | Included                                                           | Not included: outcome not considered |
| Waldman (b), 1969 <sup>74</sup><br>(n=590)   | Included (n=530) <sup><math>\Omega</math></sup> | Included                                                           | Not included: outcome not considered |
| Eddy, 1970 <sup>75</sup><br>(n=1667)         | Included                                        | Included into a separate meta-analysis of unclearly defined CCC    | Not included: outcome not considered |
| Edmondson, 1970 <sup>76</sup><br>(n=1774)    | Included                                        | Not included: influenza B vaccine as control                       | Not included: outcome not considered |
| Mogabgab (a), 1970 <sup>52</sup><br>(n=1402) | Included                                        | Included (different outcome extracted but risk ratios are similar) | Not included: outcome not considered |
| Mogabgab (b), 1970 <sup>52</sup><br>(n=1551) | Included                                        | Included (different outcome extracted but risk ratios are similar) | Not included: outcome not considered |
| Waldman (b), 1972 <sup>77</sup><br>(n=239)   | Included (n=214) <sup><math>\Omega</math></sup> | Included                                                           | Not included: outcome not considered |
| Waldman (d), 1972 <sup>77</sup><br>(n=236)   | Included (n=212) <sup><math>\Omega</math></sup> | Included                                                           | Not included: outcome not considered |
| Hoskins, 1973 <sup>7</sup><br>(n=724)        | Included                                        | Not included: influenza B vaccine as control                       | Not included: outcome not considered |
| Williams (a), 1973 <sup>78</sup><br>(n=2924) | Included                                        | Not included: influenza B vaccine as control                       | Not included: outcome not considered |
| Williams (b), 1973 <sup>78</sup><br>(n=2939) | Included                                        | Not included: influenza B vaccine as control                       | Not included: outcome not considered |
| Mair (a), 1974 <sup>54</sup><br>(n=247)      | Included                                        | Not included: influenza B vaccine as control                       | Not included: outcome not considered |
| Mair (b), 1974 <sup>54</sup><br>(n=218)      | Included                                        | Not included: influenza B vaccine as control                       | Not included: outcome not considered |
| Hammond, 1978 <sup>55</sup><br>(n=225)       | Included                                        | Included into a separate meta-analysis of unclearly defined CCC    | Not included: outcome not considered |

|                                             |                                                                                |                                                                 |                                      |
|---------------------------------------------|--------------------------------------------------------------------------------|-----------------------------------------------------------------|--------------------------------------|
| Couch (b), 1986 <sup>57</sup><br>(n=180)    | Included                                                                       | <u>Not included: probably missed in the search</u>              | Not included: outcome not considered |
| Zhilova (a), 1986 <sup>79</sup><br>(n=2203) | Not included: unclear randomization                                            | Included into a separate meta-analysis of unclearly defined CCC | Not included: outcome not considered |
| Zhilova (b), 1986 <sup>79</sup><br>(n=1831) | Not included: unclear randomization                                            | Included into a separate meta-analysis of unclearly defined CCC | Not included: outcome not considered |
| Keitel (a), 1988 <sup>58</sup><br>(n=598)   | Included (authors used a different reference as the study was published twice) | Included<br>(different outcome extracted $\gamma$ )             | Not included: outcome not considered |
| Keitel (b), 1988 <sup>58</sup><br>(n=697)   | Included (authors used a different reference as the study was published twice) | Included<br>(different outcome extracted $\gamma$ )             | Not included: outcome not considered |
| Weingarten, 1988 <sup>80</sup><br>(n=179)   | Included                                                                       | Included                                                        | Not included: outcome not considered |
| Edwards (e), 1994 <sup>59</sup><br>(n=1756) | Included – LCC-S (n=1317) <sup>Ω</sup>                                         | Not included: influenza B vaccine as control                    | Not included: outcome not considered |
| Edwards (f), 1994 <sup>59</sup><br>(n=2124) | Included – LCC-S (n=1592) <sup>Ω</sup>                                         | Not included: influenza B vaccine as control                    | Not included: outcome not considered |
| Edwards (g), 1994 <sup>59</sup><br>(n=2251) | Included – LCC-S (n=1689) <sup>Ω</sup>                                         | Not included: influenza B vaccine as control                    | Not included: outcome not considered |
| Edwards (h), 1994 <sup>59</sup><br>(n=2032) | Included – LCC-S (n=1524) <sup>Ω</sup>                                         | Not included: influenza B vaccine as control                    | Not included: outcome not considered |
| Nichol, 1995 <sup>81</sup><br>(n=825)       | Included                                                                       | Included                                                        | Not included: outcome not considered |
| Powers (a), 1995 <sup>60</sup><br>(n=50)    | Included (studies were split differently in sub-trials but data coincide)      | Included (n=34) <sup>Ω</sup>                                    | Not included: outcome not considered |
| Powers (b), 1995 <sup>60</sup><br>(n=50)    | Included (studies were split differently in sub-trials but data coincide)      | Included (n=34) <sup>Ω</sup>                                    | Not included: outcome not considered |
| Powers (c), 1995 <sup>60</sup><br>(n=75)    | Included (studies were split differently in sub-trials but data coincide)      | Included (n=59) <sup>Ω</sup>                                    | Not included: outcome not considered |
| Keitel (a), 1997 <sup>61</sup><br>(n=830)   | Included                                                                       | Included<br>(different outcome extracted $\gamma$ )             | Not included: outcome not considered |
| Keitel (b), 1997 <sup>61</sup><br>(n=940)   | Included                                                                       | Included<br>(different outcome extracted $\gamma$ )             | Not included: outcome not considered |
| Keitel (c), 1997 <sup>61</sup><br>(n=934)   | Included                                                                       | Included<br>(different outcome extracted $\gamma$ )             | Not included: outcome not considered |
| Bridges (a), 2000 <sup>63</sup><br>(n=1130) | Included                                                                       | Included                                                        | Not included: outcome not considered |

|                                             |                                     |                                                                      |                                      |
|---------------------------------------------|-------------------------------------|----------------------------------------------------------------------|--------------------------------------|
| Bridges (b), 2000 <sup>63</sup><br>(n=1178) | Included                            | Included                                                             | Not included: outcome not considered |
| Mesa Duque, 2001 <sup>82</sup><br>(n=493)   | Not included: Spanish language      | Included                                                             | Not included: outcome not considered |
| Mixéu, 2002 <sup>83</sup><br>(n=593)        | Included                            | Included                                                             | Not included: outcome not considered |
| Beran (a), 2009 <sup>66</sup><br>(n=6014)   | Not included: date                  | Included                                                             | Not included: outcome not considered |
| <u>Individual datasets on LAV*</u>          |                                     |                                                                      |                                      |
| Slepuskin, 1967 <sup>84</sup><br>(n=3193)   | Included                            | <u>Not included: outcome complex to identify <math>\gamma</math></u> | Not included: outcome not considered |
| Sumarokow, 1971 <sup>85</sup><br>(n=19,887) | Not included: Russian language      | Included into a separate meta-analysis of unclearly defined CCC      | Not included: outcome not considered |
| Monto, 1982 <sup>72</sup><br>(n=284)        | Included                            | Included                                                             | Not included: outcome not considered |
| Couch (a), 1986 <sup>57</sup><br>(n=179)    | Included                            | <u>Not included: probably missed in the search</u>                   | Not included: outcome not considered |
| Zhilova (a), 1986 <sup>79</sup><br>(n=2082) | Not included: unclear randomization | Included into a separate meta-analysis of unclearly defined CCC      | Not included: outcome not considered |
| Zhilova (b), 1986 <sup>79</sup><br>(n=1931) | Not included: unclear randomization | Included into a separate meta-analysis of unclearly defined CCC      | Not included: outcome not considered |
| Edwards (a), 1994 <sup>59</sup><br>(n=1750) | Included (n=1311) <sup>Ω</sup>      | Included                                                             | Not included: outcome not considered |
| Edwards (b), 1994 <sup>59</sup><br>(n=2093) | Included (n=1561) <sup>Ω</sup>      | Included<br>(different outcome extracted $\gamma$ )                  | Not included: outcome not considered |
| Edwards (c), 1994 <sup>59</sup><br>(n=2239) | Included (n=1676) <sup>Ω</sup>      | Included<br>(different outcome extracted $\gamma$ )                  | Not included: outcome not considered |
| Edwards (d), 1994 <sup>59</sup><br>(n=2015) | Included (n=1507) <sup>Ω</sup>      | Included<br>(different outcome extracted $\gamma$ )                  | Not included: outcome not considered |
| Nichol, 1999 <sup>86</sup><br>(n=4307)      | Included                            | Included<br>(different outcome extracted $\gamma$ )                  | Not included: outcome not considered |
| <u>Individual datasets on AIV*</u>          |                                     |                                                                      |                                      |
| Waldman (e), 1969 <sup>73</sup><br>(n=353)  | Included                            | <u>Not included: uncertain reasons <math>\gamma</math></u>           | Not included: outcome not considered |

|                                            |                           |                                                 |                                      |
|--------------------------------------------|---------------------------|-------------------------------------------------|--------------------------------------|
| Waldman (g), 1969 <sup>73</sup><br>(n=78)  | Included                  | <u>Not included: uncertain reasons</u> $\gamma$ | Not included: outcome not considered |
| Waldman (c), 1969 <sup>74</sup><br>(n=597) | Included (n=538) $\Omega$ | Included                                        | Not included: outcome not considered |
| Waldman (d), 1969 <sup>74</sup><br>(n=590) | Included (n=530) $\Omega$ | Included                                        | Not included: outcome not considered |
| Waldman (a), 1972 <sup>77</sup><br>(n=244) | Included (n=219) $\Omega$ | Included                                        | Not included: outcome not considered |
| Waldman (c), 1972 <sup>77</sup><br>(n=243) | Included (n=219) $\Omega$ | Included                                        | Not included: outcome not considered |

PIV=Parenteral inactivated vaccine; LAV=Live attenuated vaccine. LCC-C=laboratory-confirmed cases, with culture confirmation; LCC-S=laboratory-confirmed cases, with culture and/or serological confirmation.

\* Name of the first author, year of publication, sample included in the analysis. In all meta-analyses, when more than one treatment arm was included into the same study, the study was divided into sub-trials. When the meta-analysis included both LAV and PIV to derive an overall estimate, the placebo group should have been equally split between the sub-trials to avoid the inclusion of placebo data twice or more times. In single meta-analyses, it is thus possible that the total number of a study is different, depending upon the meta-analysis in which it has been included: the entire placebo arm is usually included if the meta-analysis is referred to only one type of vaccine (LAV or PIV), but the placebo arm could (and should) be split by the number of sub-trials if the meta-analysis is referred to both PIV and LAV. We have reported here the total sample of each trial as the placebo arm was not split. The letters under brackets are referred to the sub-trial and have been assigned by the authors of the first meta-analysis including the study.

§ Only the results on healthy adults are here considered.

$\Omega$  Because the meta-analysis was referred to both LAV and PIV, authors correctly extracted the data splitting the placebo arm into two, avoiding data replication.

$\gamma$

**Slepuskin 1967:** The randomized controlled trial was chaotically described within the results of a large non-randomized field trial.

**Waldman (e to h) 1969, Ohmit 2006, Ohmit 2008, Monto 2009:** As partially note in Osterholm et al. review, these studies fulfilled inclusion criteria by Jefferson et al. but they were not included and any explanation or mention to them was provided. If **Couch 1986** (published into a book) or **Jackson 2010** (published on March, just three months before the end of the search) might have been missed in the search, the above four studies have been published into widely circulating journals (JAMA, New England Journal of Medicine, Journal of Infectious Diseases, New England Journal of Medicine, respectively). Thus, it is unlikely that they have been missed in the search and no reasons are available for their exclusion.

**Edwards (a to d) 1994 LCC:** Villari et al. and Jefferson et al. extracted, respectively, the cases with symptoms and culture or serological confirmation, or the cases with symptoms and culture confirmation only. In the meta-analysis shown in the online supplemental Figures 7A, 7B and 7C we included both the cases as extracted by Villari et al. (Figure 7A, 7C), and cases as extracted by Jefferson et al. (Figure 7B, 7C).

**Edwards (b to d) 1994 CCC:** Villari et al. and Jefferson et al. extracted, respectively, all the cases (presenting for culture and retrospectively reported) and only those retrospectively reported. As single risk ratios were very similar, for the sake of simplicity in the meta-analysis shown in the online supplemental Figure 9 we included the cases as extracted by Jefferson et al.

**Keitel (a and b) 1988 and Keitel (a to c) 1997, CCC:** Villari et al and Jefferson et al. extracted, respectively, cases defined as “any illness” and “febrile illness”. As the combined risk ratios were similar, for the sake of simplicity in the meta-analysis shown in the online supplemental Figure 8 we included the cases as extracted by Jefferson et al.

**Keitel (a to c) 1997, LCC:** Villari et al and Jefferson et al. extracted, respectively, cases defined as “any illness with culture or serological confirmation” and “febrile illness with cultural or serological confirmation”. As the combined risk ratios were similar, for the sake of simplicity in the meta-analysis shown in the online supplemental Figures 7A, 7B and 7C we included the cases as extracted by Jefferson et al.

**Nichol 1999:** Villari et al and Jefferson et al. extracted, respectively, the cases (both LCC and CCC) during the peak and during the total outbreak period. As the risk ratios were very similar, for the sake of simplicity in the meta-analysis shown in the online supplemental Figure 9 we included the cases as extracted by Jefferson et al.

**Beran (b) 2009:** LCC – Data were slightly differently extracted between Osterholm et al. and Jefferson et al. The number of cases among vaccinees was 65 in Jefferson et al. meta-analysis, 63 in Osterholm et al. meta-analysis.

**Online supplemental Figure 6.** Meta-analysis evaluating the efficacy of parenteral inactivated vaccines (PIV) for preventing laboratory-confirmed cases of influenza (LCC-C if cultural confirmation only; LCC-S if cultural and/or serological confirmation) in healthy adults. All studies that were considered in at least one meta-analysis have been included, using the least restrictive criteria for outcome definition and sample inclusion criteria.

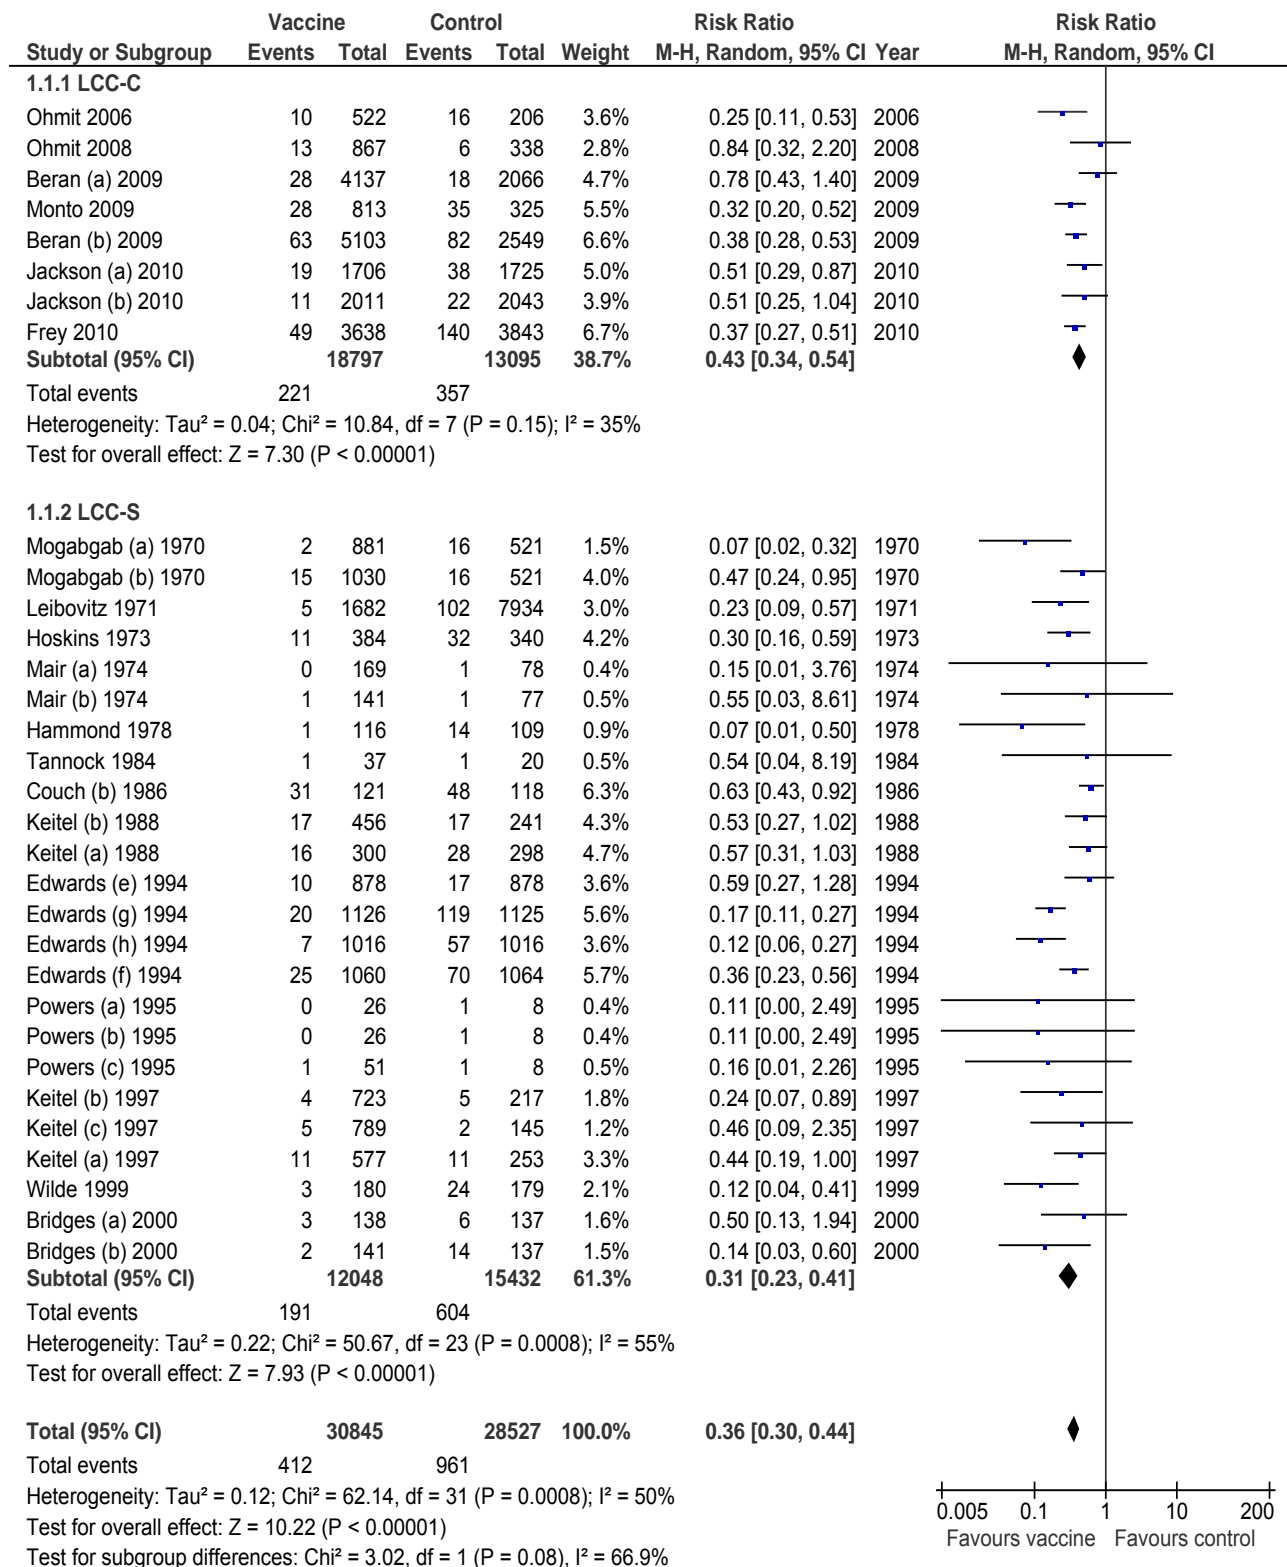



**Online supplemental Figures 7A, 7B, 7C.** Meta-analyses evaluating the efficacy of live attenuated vaccines (LAV) for preventing laboratory-confirmed cases of influenza (LCC-C if cultural confirmation only; LCC-S if cultural and/or serological confirmation) in healthy adults. All studies that were considered in at least one meta-analysis have been included, using the least restrictive criteria for outcome definition and sample inclusion criteria (Figure 7A) or more restrictive criteria in outcome extraction (Figure 7B). In specific, some studies (Edwards 1994 all, Ohmit 2006 and Ohmit 2008) reported both LCC-C and LCC-S outcomes, and data extraction could differ depending upon inclusion criteria (with regard to outcome definition). Because the results might relevantly differ, we extracted both outcomes data from that trials and reported two separate meta-analyses. Both LCC-C and LCC-S data from these studies were separately reported in Figure 7C to enable an indirect evaluation of the influence of outcome type on vaccine efficacy.

**7A**

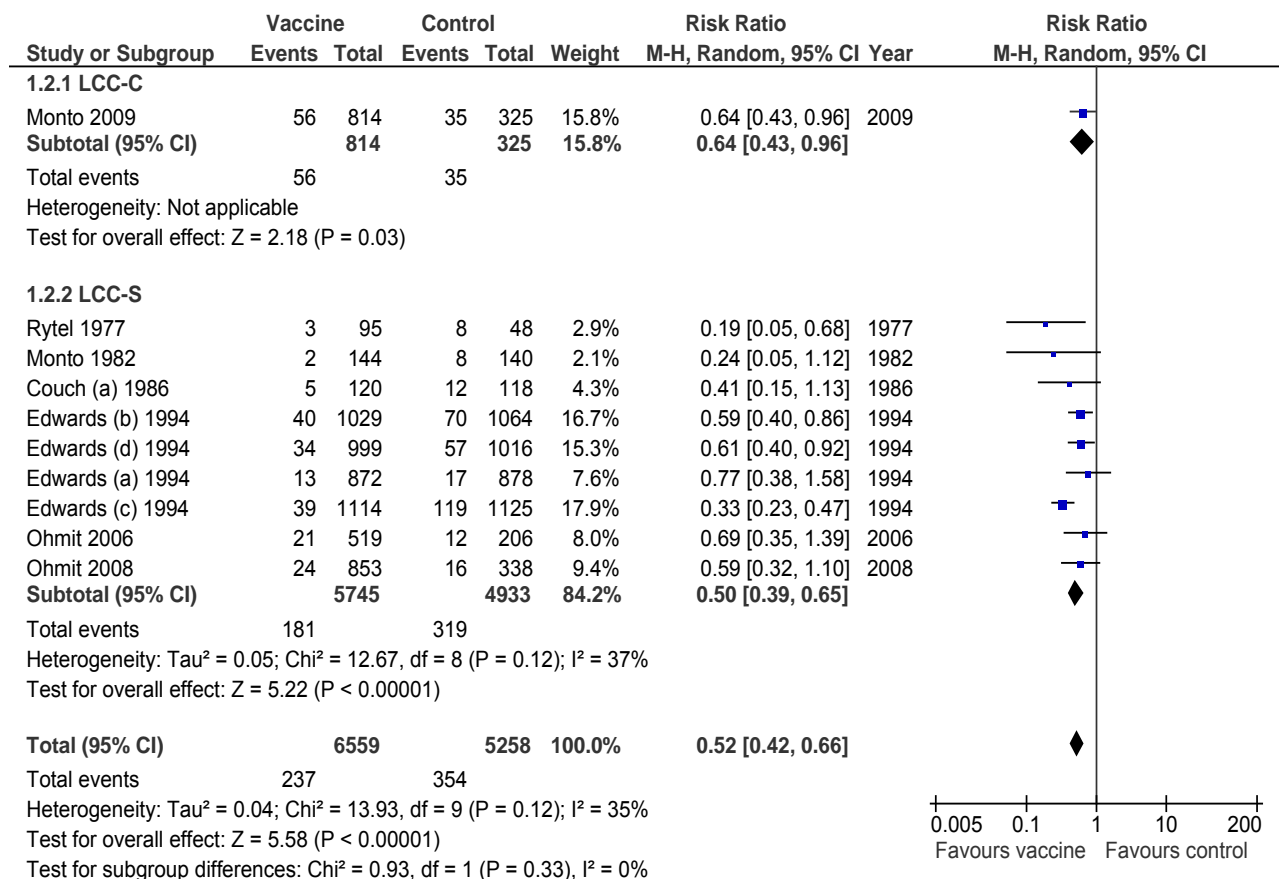

**7B**

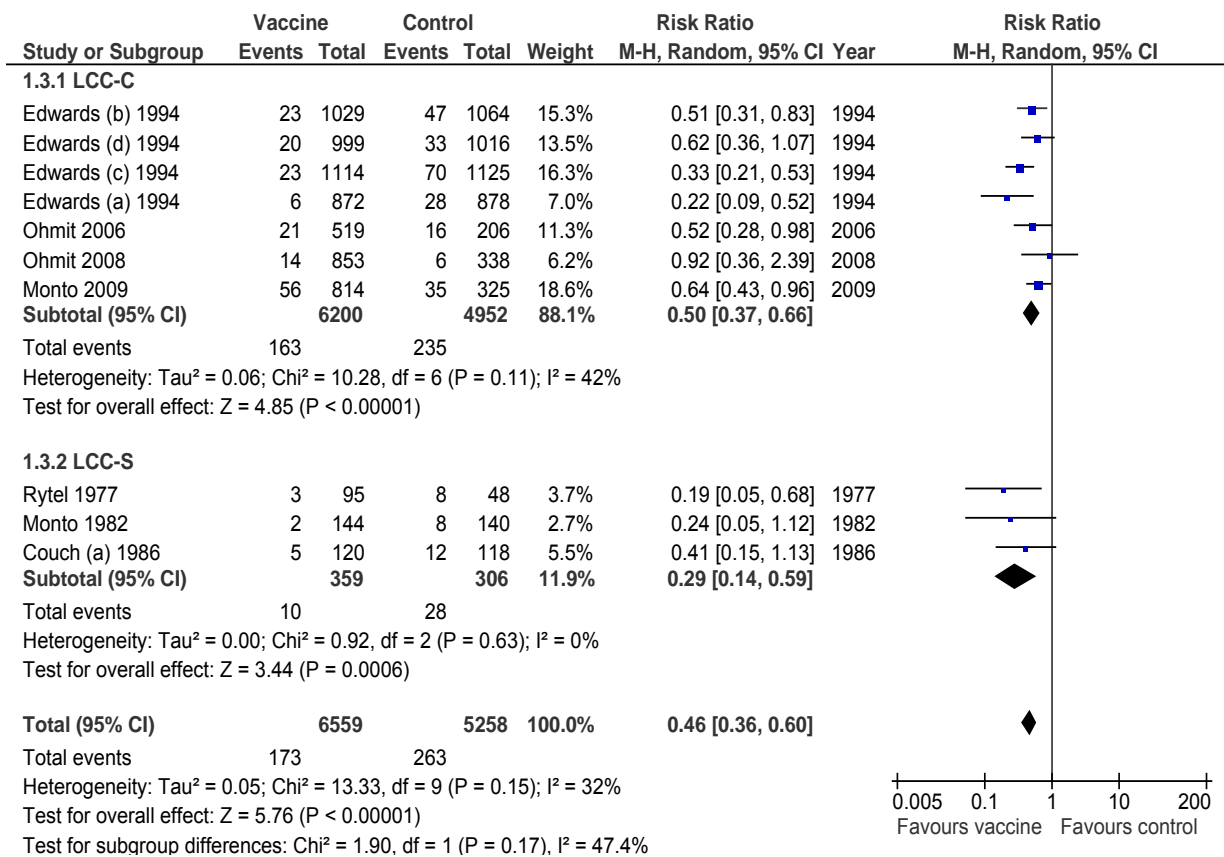

## 7C

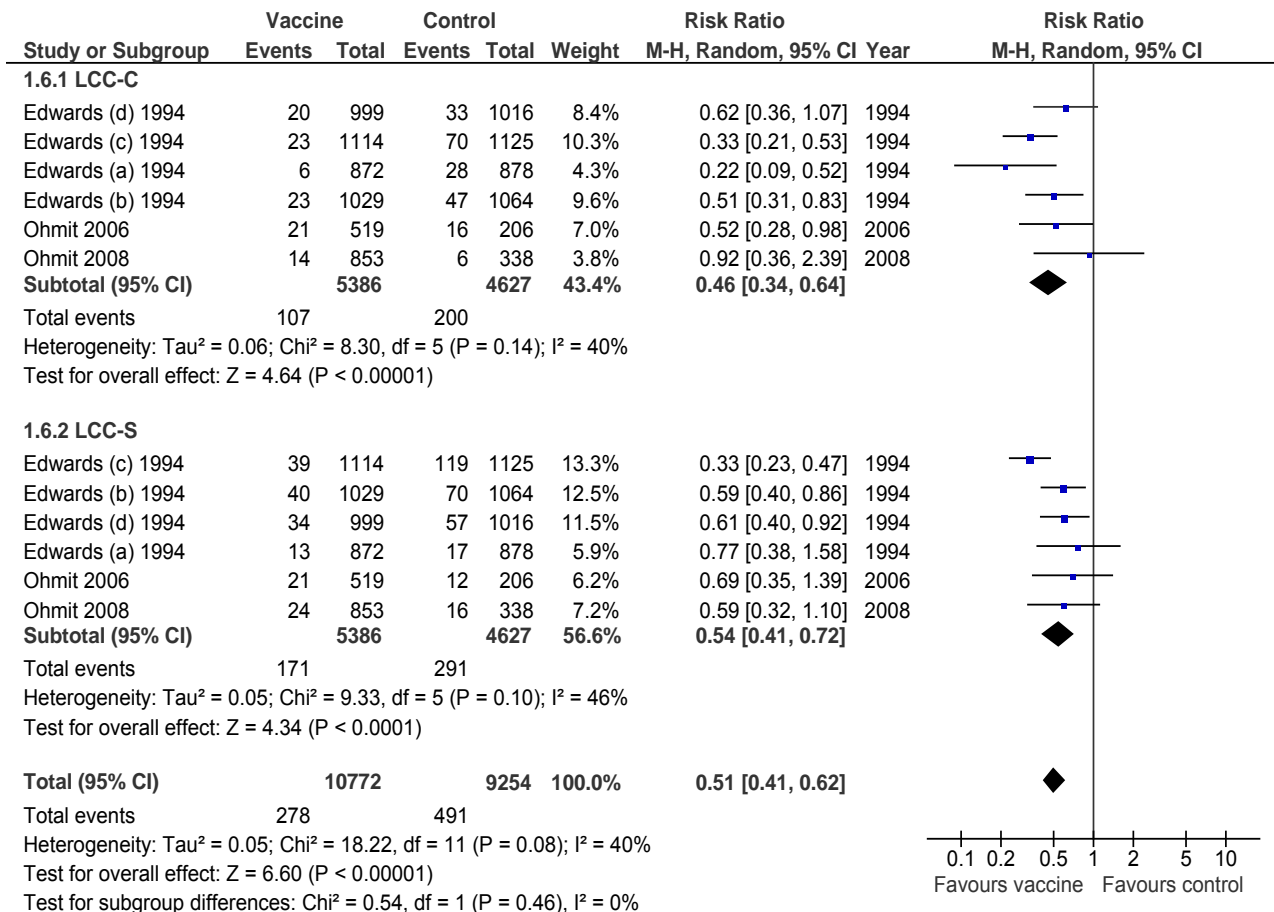

**Online supplemental Figure 8.** Meta-analysis evaluating the efficacy of parenteral inactivated vaccines (PIV) for preventing clinically-confirmed cases of influenza (CCC) in healthy adults. All studies that were considered in at least one meta-analysis have been included, using the least restrictive criteria for outcome definition and sample inclusion criteria.

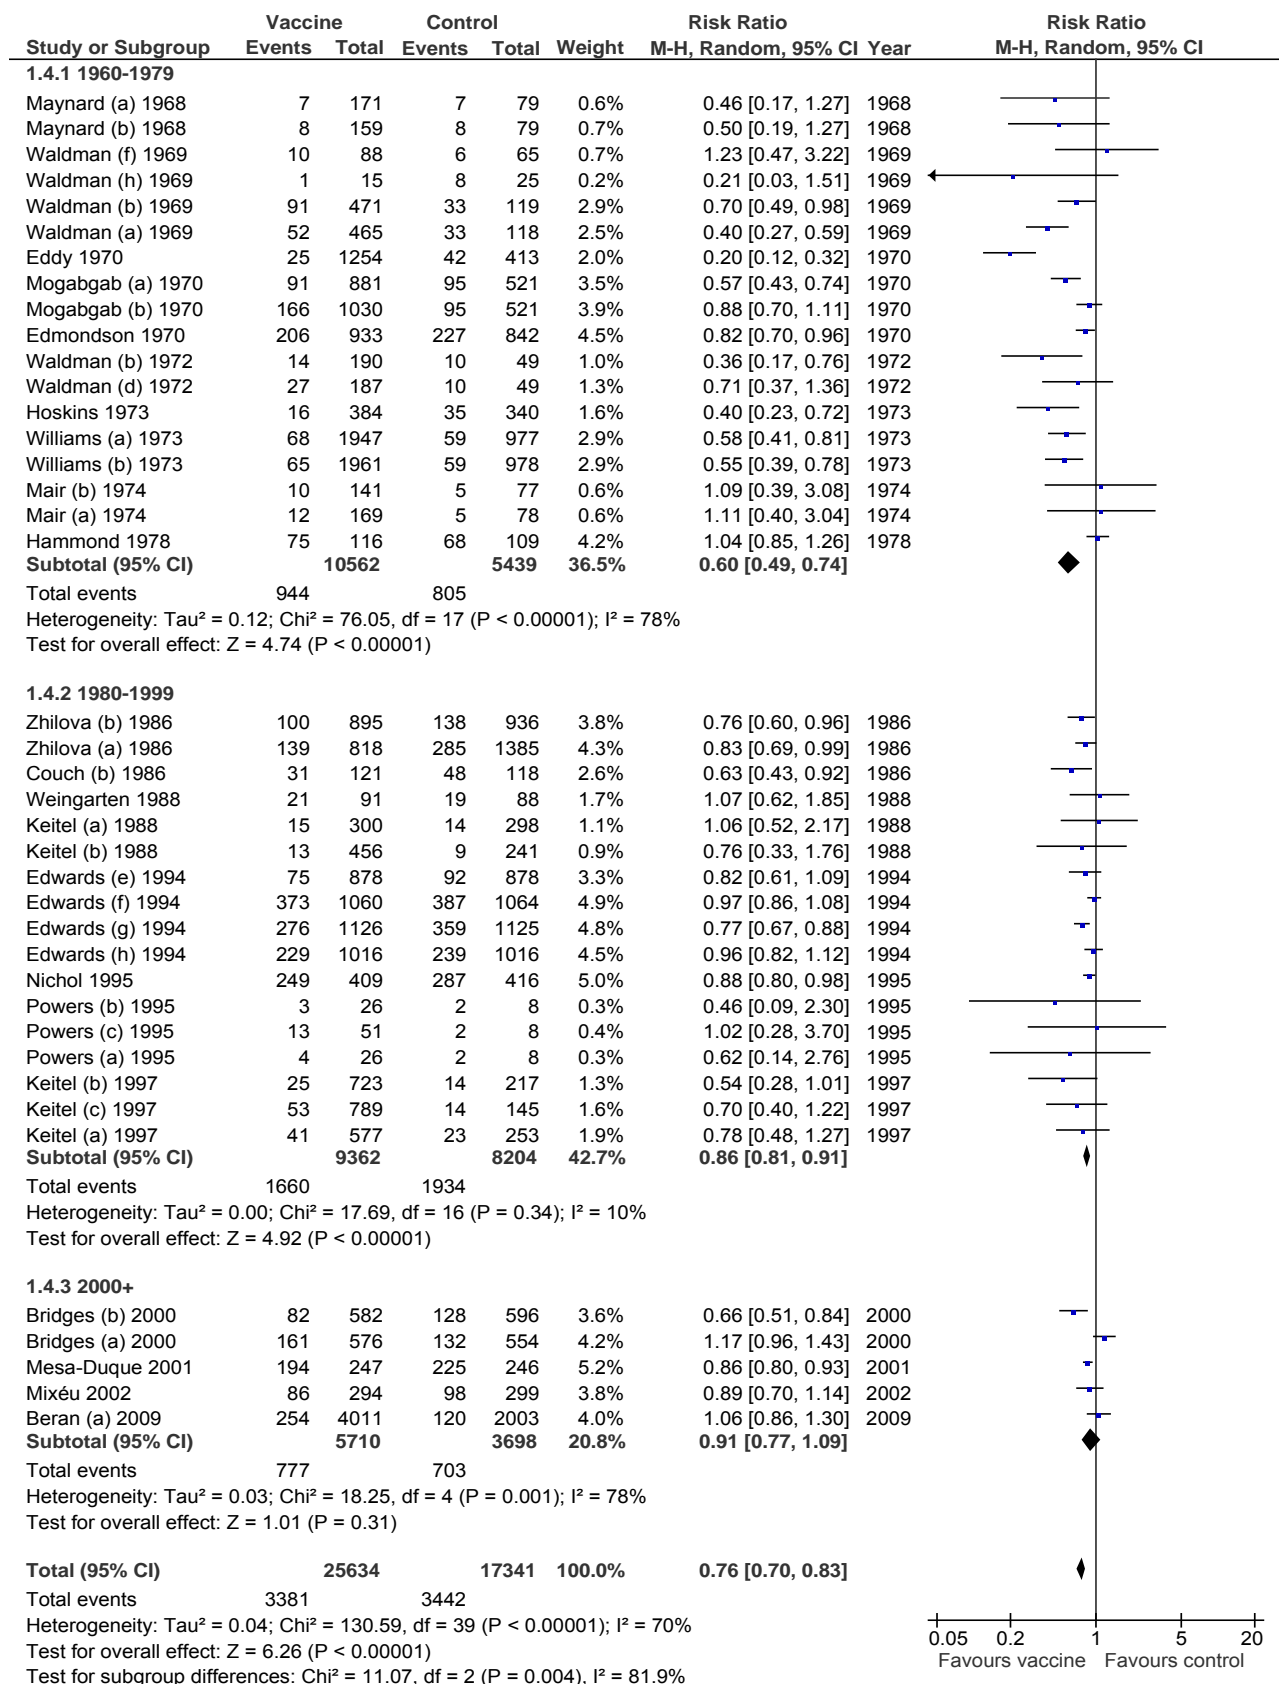

**Online supplemental Figure 9.** Meta-analysis evaluating the efficacy of live attenuated vaccines (LAV) for preventing clinically-confirmed cases of influenza (CCC) in healthy adults. All studies that were considered in at least one meta-analysis have been included, using the least restrictive criteria for outcome definition and sample inclusion criteria.

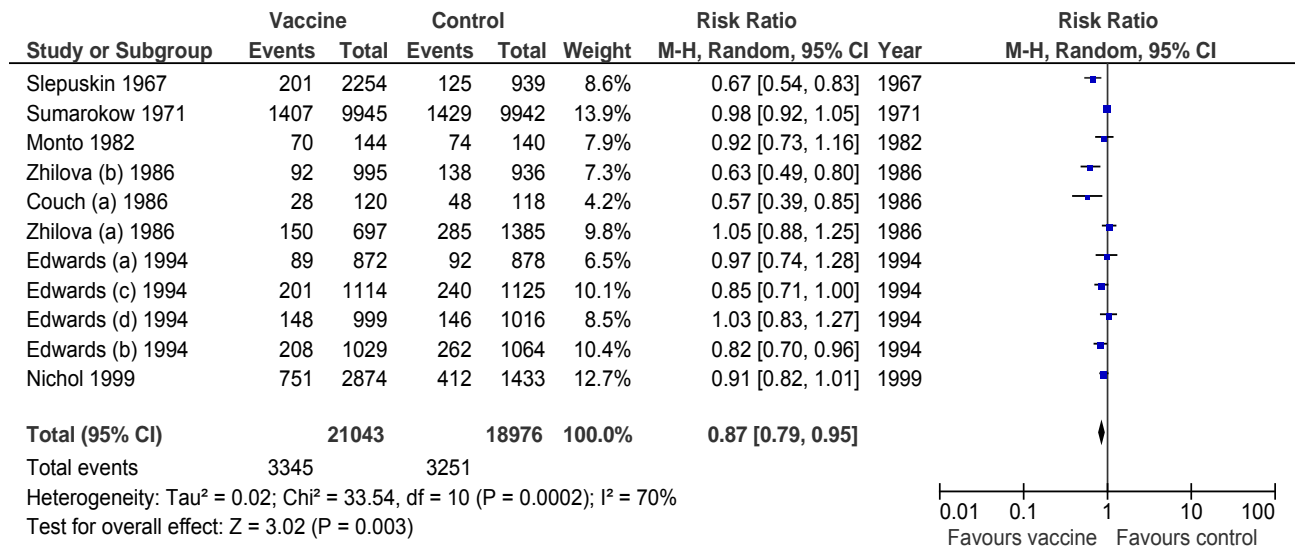

**Online supplemental Figure 10.** Meta-analysis evaluating the efficacy of parenteral inactivated vaccines for preventing clinically-confirmed cases of influenza (CCC) in the elderly. Only the datasets that have been published after 2000 (the year of the search end by Vu et al.<sup>87</sup>) were included<sup>88-93</sup>.

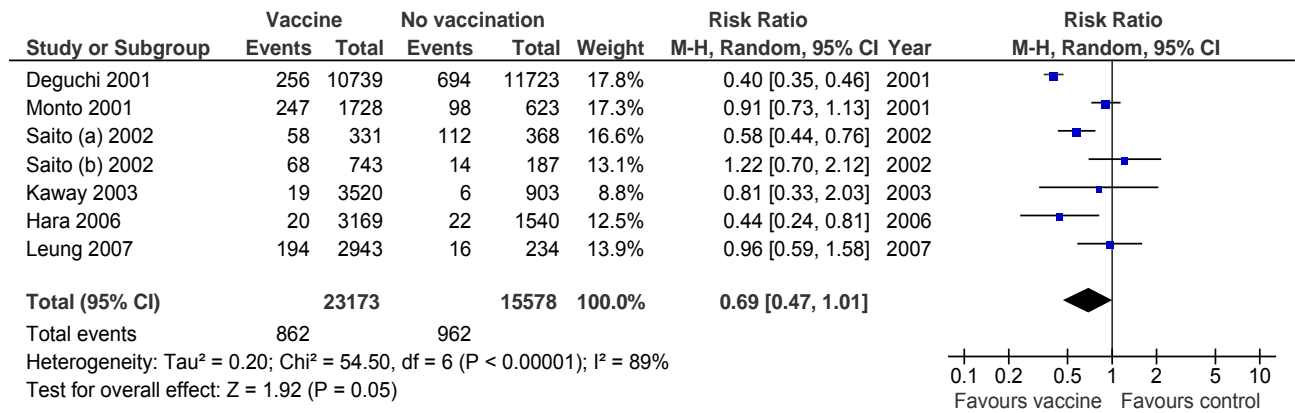

**Online supplemental Figure 11.** Meta-analysis evaluating the efficacy of parenteral inactivated vaccines for preventing all deaths in the elderly. Only the datasets that have been published after 2000 (the year of the search end by Vu et al. <sup>87</sup>) were included <sup>94-96</sup>.

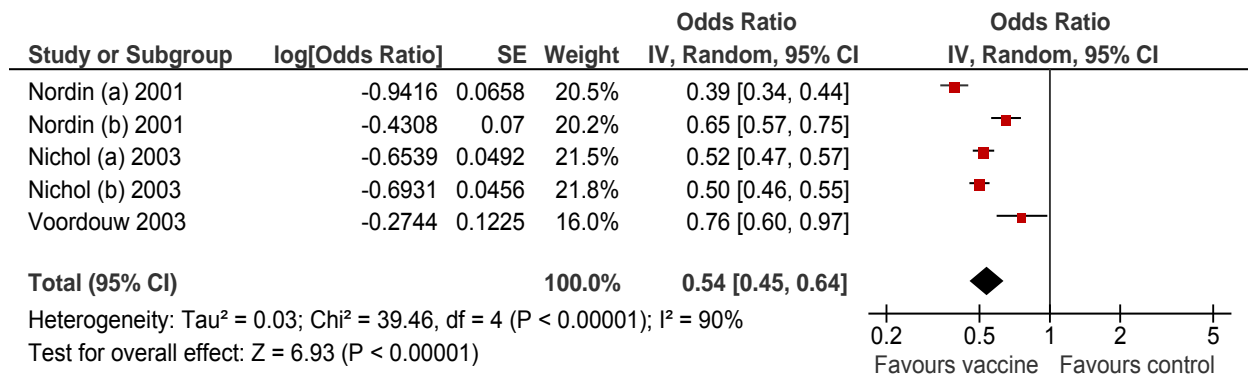

## References

1. Negri E, Colombo C, Giordano L, Groth N, Apolone G, La Vecchia C. Influenza vaccine in healthy children: a meta-analysis. *Vaccine* 2005; 23:2851-61.
2. Manzoli L, Schioppa F, Boccia A, Villari P. The efficacy of influenza vaccine for healthy children: a meta-analysis evaluating potential sources of variation in efficacy estimates including study quality. *Pediatr Infect Dis J* 2007; 26:97-106.
3. Jefferson T, Rivetti A, Harnden A, Di Pietrantonj C, Demicheli V. Vaccines for preventing influenza in healthy children. *Cochrane Database Syst Rev* 2008:CD004879.
4. Rhorer J, Ambrose CS, Dickinson S, Hamilton H, Oleka NA, Malinoski FJ, et al. Efficacy of live attenuated influenza vaccine in children: A meta-analysis of nine randomized clinical trials. *Vaccine* 2009; 27:1101-10.
5. Osterholm MT, Kelley NS, Sommer A, Belongia EA. Efficacy and effectiveness of influenza vaccines: a systematic review and meta-analysis. *The Lancet infectious diseases* 2011.
6. Wesselijs-de Casparis A, Masurel N, Kerrebijn KF. Field trial with human and equine influenza vaccines in children: protection and antibody titres. *Bull World Health Organ* 1972; 46:151-7.
7. Hoskins TW, Davies JR, Allchin A, Miller CL, Pollock TM. Controlled trial of inactivated influenza vaccine containing the a-Hong Kong strain during an outbreak of influenza due to the a-England-42-72 strain. *Lancet* 1973; 2:116-20.
8. Beutner KR, Chow T, Rubi E, Strussenberg J, Clement J, Ogra PL. Evaluation of a neuraminidase-specific influenza A virus vaccine in children: antibody responses and effects on two successive outbreaks of natural infection. *J Infect Dis* 1979; 140:844-50.
9. Feldman S, Wright PF, Webster RG, Roberson PK, Mahoney J, Thompson J, et al. Use of influenza A virus vaccines in seronegative children: live cold-adapted versus inactivated whole virus. *J Infect Dis* 1985; 152:1212-8.
10. Gruber WC, Taber LH, Glezen WP, Clover RD, Abell TD, Demmler RW, et al. Live attenuated and inactivated influenza vaccine in school-age children. *Am J Dis Child* 1990; 144:595-600.
11. Clover RD, Crawford S, Glezen WP, Taber LH, Matson CC, Couch RB. Comparison of heterotypic protection against influenza A/Taiwan/86 (H1N1) by attenuated and inactivated vaccines to A/Chile/83-like viruses. *J Infect Dis* 1991; 163:300-4.
12. Piedra PA, Glezen, W.P. Influenza in children: epidemiology, immunity, and vaccines. *Seminars in Pediatric Infectious Diseases* 1991; 2:140-6.
13. Slepishkin AN, Obrosova-Serova NP, Burtseva EI, Rudenko LG, Govorkova EA, Vartanyan RV, et al. Comparison of live attenuated and inactivated influenza vaccines in schoolchildren in Russia: I. Safety and efficacy in two Moscow schools, 1987/88. *Vaccine* 1993; 11:323-8.
14. Khan AS, Polezhaev F, Vasiljeva R, Drinevsky V, Buffington J, Gary H, et al. Comparison of US inactivated split-virus and Russian live attenuated, cold-adapted trivalent influenza vaccines in Russian schoolchildren. *J Infect Dis* 1996; 173:453-6.
15. Hurwitz ES, Haber M, Chang A, Shope T, Teo ST, Giesick JS, et al. Studies of the 1996-1997 inactivated influenza vaccine among children attending day care: immunologic response, protection against infection, and clinical effectiveness. *J Infect Dis* 2000; 182:1218-21.
16. Neuzil KM, Dupont WD, Wright PF, Edwards KM. Efficacy of inactivated and cold-adapted vaccines against influenza A infection, 1985 to 1990: the pediatric experience. *Pediatr Infect Dis J* 2001; 20:733-40.
17. Hoberman A, Greenberg DP, Paradise JL, Rockette HE, Lave JR, Kearney DH, et al. Effectiveness of inactivated influenza vaccine in preventing acute otitis media in young children: a randomized controlled trial. *JAMA* 2003; 290:1608-16.
18. Belshe RB, Mendelman PM, Treanor J, King J, Gruber WC, Piedra P, et al. The efficacy of live attenuated, cold-adapted, trivalent, intranasal influenzavirus vaccine in children. *N Engl J Med* 1998; 338:1405-12.
19. Vesikari T, Fleming DM, Aristegui JF, Vertruyen A, Ashkenazi S, Rappaport R, et al. Safety, efficacy, and effectiveness of cold-adapted influenza vaccine-trivalent against community-acquired, culture-confirmed influenza in young children attending day care. *Pediatrics* 2006; 118:2298-312.
20. Tam JS, Capeding MR, Lum LC, Chotpitayasunondh T, Jiang Z, Huang LM, et al. Efficacy and safety of a live attenuated, cold-adapted influenza vaccine, trivalent against culture-confirmed influenza in young children in Asia. *Pediatr Infect Dis J* 2007; 26:619-28.
21. Forrest BD, Pride MW, Dunning AJ, Capeding MR, Chotpitayasunondh T, Tam JS, et al. Correlation of cellular immune responses with protection against culture-confirmed influenza virus in young children. *Clin Vaccine Immunol* 2008; 15:1042-53.

22. Bracco Neto H, Farhat CK, Tregnaghi MW, Madhi SA, Razmpour A, Palladino G, et al. Efficacy and safety of 1 and 2 doses of live attenuated influenza vaccine in vaccine-naive children. *Pediatr Infect Dis J* 2009; 28:365-71.
23. Lum LC, Borja-Tabora CF, Breiman RF, Vesikari T, Sablan BP, Chay OM, et al. Influenza vaccine concurrently administered with a combination measles, mumps, and rubella vaccine to young children. *Vaccine* 2010; 28:1566-74.
24. Maynard JE, Dull HB, Hanson ML, Feltz ET, Berger R, Hammes L. Evaluation of monovalent and polyvalent influenza vaccines during an epidemic of type A2 and B influenza. *Am J Epidemiol* 1968; 87:148-57.
25. Rudenko LG, Slepushkin AN, Monto AS, Kendal AP, Grigorieva EP, Burtseva EP, et al. Efficacy of live attenuated and inactivated influenza vaccines in schoolchildren and their unvaccinated contacts in Novgorod, Russia. *J Infect Dis* 1993; 168:881-7.
26. Colombo C, Argiolas L, La Vecchia C, Negri E, Meloni G, Meloni T. Influenza vaccine in healthy preschool children. *Rev Epidemiol Sante Publique* 2001; 49:157-62.
27. Marchisio P, Cavagna R, Maspes B, Gironi S, Esposito S, Lambertini L, et al. Efficacy of intranasal virosomal influenza vaccine in the prevention of recurrent acute otitis media in children. *Clin Infect Dis* 2002; 35:168-74.
28. Slepushkin AN, Dukova VS, Kalegaeva VA, Kagan AN, Temriuk EE. [Results of studying the effectiveness of a live influenza vaccine for peroral use on preschool and schoolchildren]. *Zh Mikrobiol Epidemiol Immunobiol* 1974:24-9.
29. Alexandrova GI, Budilovsky GN, Koval TA, Polezhaev FI, Garmashova LM, Ghendon Yu Z, et al. Study of live recombinant cold-adapted influenza bivalent vaccine of type A for use in children: an epidemiological control trial. *Vaccine* 1986; 4:114-8.
30. Rudenko LG, Grigor'eva EP, Drinevskii VP, Koval TA, Doroshenko EM. [Results of a study of a live intranasal influenza vaccine in the immunization of children 3 to 15 years old]. *Zh Mikrobiol Epidemiol Immunobiol* 1988; 5:41-6.
31. Rudenko LG, Lonskaya NI, Klimov AI, Vasilieva RI, Ramirez A. Clinical and epidemiological evaluation of a live, cold-adapted influenza vaccine for 3-14-year-olds. *Bull World Health Organ* 1996; 74:77-84.
32. Rudenko LG, Vasil'eva RI, Ismagulov AT, Karagodina VI, Slepushkin AN, Doroshenko EM, et al. [Prophylactic effectiveness of a live recombinant influenza type A vaccine in immunizing children aged 3-14 years]. *Vopr Virusol* 1996; 41:37-9.
33. Grigor'eva EP, Desheva lu A, Donina SA, Naikhin AN, Rekstin AR, Barantseva IB, et al. [The comparative characteristics of the safety, immunogenic activity and prophylactic potency of the adult and children types of live influenza vaccine in schoolchildren aged 7-14 years]. *Vopr Virusol* 2002; 47:24-7.
34. Clements DA, Langdon L, Bland C, Walter E. Influenza A vaccine decreases the incidence of otitis media in 6- to 30-month-old children in day care. *Arch Pediatr Adolesc Med* 1995; 149:1113-7.
35. Vasil'eva RI, Merkur'eva LA, Iatsenko VG, Vasil'eva AM, Shvager MM. [Characteristics of the clinical and immunologic safety of inactivated influenza vaccines in children undergoing multiple immunizations]. *Zh Mikrobiol Epidemiol Immunobiol* 1988:65-9.
36. Vasil'eva RI, Smirnova LA, Rudenko LG, Drinevskii VP, Tsaritsina IM. [The results of state trials of inactivated influenza vaccines for children]. *Zh Mikrobiol Epidemiol Immunobiol* 1988:49-54.
37. El'shina GA, Gorbunov MA, Bektimirov TA, Lonskaia NI, Pavlova LI, Nikul'shin AA, et al. [The evaluation of the reactogenicity, harmlessness and prophylactic efficacy of Grippol trivalent polymer-subunit influenza vaccine administered to schoolchildren]. *Zh Mikrobiol Epidemiol Immunobiol* 2000:50-4.
38. Aksenov VA, Selidovkin DA, Sorokina LV, Burnos AS, Sorokina AG. [The effectiveness of influenza prevention with a special variation of live influenza vaccine for children in the 1969 epidemic]. *Vopr Virusol* 1971; 16:81-6.
39. Bashliaeva ZA, Sumarokov AA, Nefedova LA, Iaroshevskaja I, Ozeretskovskaia NA. [Basic results of a committee trial of the new vaccine Grippovac SE-AZh]. *Zh Mikrobiol Epidemiol Immunobiol* 1986:49-54.
40. Burtseva EI, Obrosova-Serova NP, Govorkova EA, Rudenko LG, Vartanian RV, Beliaev AL, et al. [A comparative study of the protective properties of live recombinant and inactivated influenza vaccines made from strain A/Philippines/2/82 (H3N2) in 8- to 15-year-old children]. *Vopr Virusol* 1991; 36:375-7.
41. Chumakov MP, Boiko VM, Malysheva LP, Mel'nikova SK, Rodin VI. [Results of coded trials of the activity of the trivalent subunit influenza vaccine Grippovak in Moscow kindergartens in December 1983 through the 1st quarter of 1984]. *Vopr Virusol* 1987; 32:175-83.
42. Desheva lu A, Danini GV, Grigor'eva EP, Donina SA, Kiseleva IV, Rekstin AR, et al. [The investigation of the safety, genetic stability and immunogenicity of live influenza vaccine for adults in vaccination of 3-6 years old children]. *Vopr Virusol* 2002; 47:21-4.



43. Grigor'eva EP, Rekstin AR, Rudenko LG, Ramirez A, Barro M, Lisovskaia KV, et al. [The immunogenic properties and prophylactic efficacy of a live polyvalent influenza vaccine in children 5 to 14 years old]. *Vopr Virusol* 1994; 39:26-9.
44. Obrosova-Serova NP, Slepushkin AN, Kendal AP, Harmon MW, Burtseva EI, Bebesheva NI, et al. Evaluation in children of cold-adapted influenza B live attenuated intranasal vaccine prepared by reassortment between wild-type B/Ann Arbor/1/86 and cold-adapted B/Leningrad/14/55 viruses. *Vaccine* 1990; 8:57-60.
45. Slepushkin AN, Patriarca PA, Obrosova-Serova NP, Harmon MW, Kupryashina LN, Cheshik SG, et al. Class-specific antibody responses in school children vaccinated with an A/Brazil/11/78 (H1N1)-like recombinant influenza virus prepared from the A/Leningrad/134/57 paediatric cold-adapted donor strain. *Vaccine* 1988; 6:25-8.
46. Slepushkin AN, Obrosova-Serova NP, Burtseva EI, Govorkova EA, Rudenko LG, Vartanian RV, et al. [A comparative study of the inoculation properties of live recombinant and inactivated influenza vaccines made from strain A/Philippines/2/82 (H3N2) in 8- to 15-year-old children]. *Vopr Virusol* 1991; 36:372-4.
47. Slepushkin AN, Rudenko LG, Kendal AP, Monto AS, Beliaev AL, Burtseva EI, et al. [A comparative study of live and inactivated influenza vaccines: the organization of the observation and the results of a study of their reactogenicity and immunogenicity]. *Vopr Virusol* 1994; 39:129-31.
48. Slobodniuk AV, Romanenko VV, Utnitskaia OS, Motus TM, Pereverzev AV. [Influence of multiplicity of immunizations of children with inactivated influenza vaccine on immune response and the effectiveness of protection]. *Zh Mikrobiol Epidemiol Immunobiol* 2002:36-9.
49. Vasil'eva RI, Osidak LV, Bichurina MA, Mukhina LP, Chudina LV. [Evaluation of the safety, reactogenicity and antigenic activity of inactivated chromatographic influenza vaccine in school children]. *Zh Mikrobiol Epidemiol Immunobiol* 1982:96-8.
50. Villari P, Manzoli L, Boccia A. Methodological quality of studies and patient age as major sources of variation in efficacy estimates of influenza vaccination in healthy adults: a meta-analysis. *Vaccine* 2004; 22:3475-86.
51. Jefferson T, Di Pietrantonj, C., Rivetti, A., Bawazeer, G.A., Al-Ansary, L.A., Ferroni, E. Vaccines for preventing influenza in healthy adults. *Cochrane Database Syst Rev* 2010; CD001269.
52. Mogabgab WJ, Leiderman E. Immunogenicity of 1967 polyvalent and 1968 Hong Kong influenza vaccines. *JAMA* 1970; 211:1672-6.
53. Leibovitz A, Coultrip RL, Kilbourne ED, Legters LJ, Smith CD, Chin J, et al. Correlated studies of a recombinant influenza-virus vaccine. IV. Protection against naturally occurring influenza in military trainees. *J Infect Dis* 1971; 124:481-7.
54. Mair HJ, Sansome DA, Tillett HE. A controlled trial of inactivated monovalent influenza A vaccines in general practice. *J Hyg (Lond)* 1974; 73:317-27.
55. Hammond ML, Ferris AA, Faine S, McAvan T. Effective protection against influenza after vaccination with subunit vaccine. *Med J Aust* 1978; 1:301-3.
56. Tannock GA, Bryce DA, Hensley MJ, Saunders NA, Gillett RS, Kennedy WS. Responses to one or two doses of a deoxycholate subunit influenza vaccine in a primed population. *Vaccine* 1984; 2:100-6.
57. Couch R, Quarles, JM, Cate, TR, Zahradnik, JM. Clinical trials with live cold-reassortment influenza virus vaccines. In: Kendal A, Patriarca, PA, ed. *Options for the control of influenza*. New York: Alan R Liss, 1986:223-41.
58. Keitel WA, Cate TR, Couch RB. Efficacy of sequential annual vaccination with inactivated influenza virus vaccine. *Am J Epidemiol* 1988; 127:353-64.
59. Edwards KM, Dupont WD, Westrich MK, Plummer WD, Jr., Palmer PS, Wright PF. A randomized controlled trial of cold-adapted and inactivated vaccines for the prevention of influenza A disease. *J Infect Dis* 1994; 169:68-76.
60. Powers DC, Smith GE, Anderson EL, Kennedy DJ, Hackett CS, Wilkinson BE, et al. Influenza A virus vaccines containing purified recombinant H3 hemagglutinin are well tolerated and induce protective immune responses in healthy adults. *J Infect Dis* 1995; 171:1595-9.
61. Keitel WA, Cate TR, Couch RB, Huggins LL, Hess KR. Efficacy of repeated annual immunization with inactivated influenza virus vaccines over a five year period. *Vaccine* 1997; 15:1114-22.
62. Wilde JA, McMillan JA, Serwint J, Butta J, O'Riordan MA, Steinhoff MC. Effectiveness of influenza vaccine in health care professionals: a randomized trial. *JAMA* 1999; 281:908-13.
63. Bridges CB, Thompson WW, Meltzer MI, Reeve GR, Talamonti WJ, Cox NJ, et al. Effectiveness and cost-benefit of influenza vaccination of healthy working adults: A randomized controlled trial. *JAMA* 2000; 284:1655-63.
64. Ohmit SE, Victor JC, Rotthoff JR, Teich ER, Truscon RK, Baum LL, et al. Prevention of antigenically drifted influenza by inactivated and live attenuated vaccines. *N Engl J Med* 2006; 355:2513-22.

65. Ohmit SE, Victor JC, Teich ER, Truscon RK, Rotthoff JR, Newton DW, et al. Prevention of symptomatic seasonal influenza in 2005-2006 by inactivated and live attenuated vaccines. *J Infect Dis* 2008; 198:312-7.
66. Beran J, Wertzova V, Honegr K, Kaliskova E, Havlickova M, Havlik J, et al. Challenge of conducting a placebo-controlled randomized efficacy study for influenza vaccine in a season with low attack rate and a mismatched vaccine B strain: a concrete example. *BMC Infect Dis* 2009; 9:2.
67. Beran J, Vesikari T, Wertzova V, Karvonen A, Honegr K, Lindblad N, et al. Efficacy of inactivated split-virus influenza vaccine against culture-confirmed influenza in healthy adults: a prospective, randomized, placebo-controlled trial. *J Infect Dis* 2009; 200:1861-9.
68. Monto AS, Ohmit SE, Petrie JG, Johnson E, Truscon R, Teich E, et al. Comparative efficacy of inactivated and live attenuated influenza vaccines. *N Engl J Med* 2009; 361:1260-7.
69. Frey S, Vesikari T, Szymczakiewicz-Multanowska A, Lattanzi M, Izu A, Groth N, et al. Clinical efficacy of cell culture-derived and egg-derived inactivated subunit influenza vaccines in healthy adults. *Clin Infect Dis* 2010; 51:997-1004.
70. Jackson LA, Gaglani MJ, Keyserling HL, Balser J, Bouveret N, Fries L, et al. Safety, efficacy, and immunogenicity of an inactivated influenza vaccine in healthy adults: a randomized, placebo-controlled trial over two influenza seasons. *BMC Infect Dis* 2010; 10:71.
71. Rytel MW, Jackson LJ, Niebojewski RA, Haagensen JL, Rosenkranz MA. Field trial of live attenuated influenza A/B ("Alice"/R-75) vaccine. *Am J Epidemiol* 1977; 105:49-55.
72. Monto AS, Miller FD, Maassab HF. Evaluation of an attenuated, cold-recombinant influenza B virus vaccine. *J Infect Dis* 1982; 145:57-64.
73. Waldman RH, Mann JJ, Small PA, Jr. Immunization against influenza. Prevention of illness in man by aerosolized inactivated vaccine. *JAMA* 1969; 207:520-4.
74. Waldman RH, Bond JO, Levitt LP, Hartwig EC, Prather EC, Baratta RL, et al. An evaluation of influenza immunization: influence of route of administration and vaccine strain. *Bull World Health Organ* 1969; 41:543-8.
75. Eddy TS, Davies NA. The effect of vaccine on a closed epidemic of Hong Kong influenza. *S Afr Med J* 1970; 44:214-6.
76. Edmondson KW, Graham DS, Warburton MF. A clinical trial of influenza vaccine in Canberra. *Med J Aust* 1970; 2:6-13.
77. Waldman RH, Coggins WJ. Influenza immunization: field trial on a university campus. *J Infect Dis* 1972; 126:242-8.
78. Williams MC, Davignon L, McDonald JC, Pavilanis PV, Boudreault A, Clayton AJ. Trials of aqueous killed influenza vaccine in Canada, 1968-69. *Bull World Health Organ* 1973; 49:333-40.
79. Zhilova GP, Ignat'eva GS, Orlov VA, Malikova EV, Maksakova VL. [Results of a study of the effectiveness of simultaneous immunization against influenza with live and inactivated vaccines (1980-1983)]. *Vopr Virusol* 1986; 31:40-4.
80. Weingarten S, Staniloff H, Ault M, Miles P, Bamberger M, Meyer RD. Do hospital employees benefit from the influenza vaccine? A placebo-controlled clinical trial. *J Gen Intern Med* 1988; 3:32-7.
81. Nichol KL, Lind A, Margolis KL, Murdoch M, McFadden R, Hauge M, et al. The effectiveness of vaccination against influenza in healthy, working adults. *N Engl J Med* 1995; 333:889-93.
82. Mesa-Duque S, Moreno AP, Hurtado, G, Arbelàaz Montoya, MP. Effectiveness of an Influenza Vaccine in a working population in Colombia [Efectividad de una vacuna anti gripal en una población laboral colombiana]. *Pan American Journal of Public Health* 2001; 10:232-9.
83. Mixeu MA, Vespa GN, Forleo-Neto E, Toniolo-Neto J, Alves PM. Impact of influenza vaccination on civilian aircrew illness and absenteeism. *Aviat Space Environ Med* 2002; 73:876-80.
84. Slepuskin AN, Bobyleva TK, Russina AE, Vitkina BS, Ellengorn NS, Zdanov VM. Evaluation of the effectiveness of large-scale vaccination against influenza in the USSR. *Bull World Health Organ* 1967; 36:385-95.
85. Sumarokov A, Popov, VF, Nefedova, LA, Salmin, LV, Lazorenko, NF. [Study of live influenza vaccines in a controlled trial. 3. Evaluation of the epidemiological effectiveness of live influenza vaccines]. *Zh Mikrobiol Epidemiol Immunobiol* 1971; 48:46-53.
86. Nichol KL, Mendelman PM, Mallon KP, Jackson LA, Gorse GJ, Belshe RB, et al. Effectiveness of live, attenuated intranasal influenza virus vaccine in healthy, working adults: a randomized controlled trial. *JAMA* 1999; 282:137-44.
87. Vu T, Farish S, Jenkins M, Kelly H. A meta-analysis of effectiveness of influenza vaccine in persons aged 65 years and over living in the community. *Vaccine* 2002; 20:1831-6.
88. Monto AS, Hornbuckle K, Ohmit SE. Influenza vaccine effectiveness among elderly nursing home residents: a cohort study. *Am J Epidemiol* 2001; 154:155-60.

89. Deguchi Y, Nishimura K. Efficacy of Influenza Vaccine in Elderly Persons in Welfare Nursing Homes: Reduction in Risks of Mortality and Morbidity During an Influenza A (H3N2) Epidemic. *J Gerontol A Biol Sci Med Sci* 2001; 56:M391-4.
90. Saito R, Suzuki H, Oshitani H, Sakai T, Seki N, Tanabe N. The effectiveness of influenza vaccine against influenza a (H3N2) virus infections in nursing homes in Niigata, Japan, during the 1998-1999 and 1999-2000 seasons. *Infect Control Hosp Epidemiol* 2002; 23:82-6.
91. Leung J. Effectiveness of influenza vaccination among elderly home residents in Hong Kong: a retrospective cohort study. *Hong Kong Practitioner* 2007; 29:123-33.
92. Kawai N, Ikematsu H, Iwaki N, Satoh I, Kawashima T, Tsuchimoto T, et al. A prospective, Internet-based study of the effectiveness and safety of influenza vaccination in the 2001-2002 influenza season. *Vaccine* 2003; 21:4507-13.
93. Hara M, Sakamoto T, Tanaka K. Effectiveness of influenza vaccination in preventing influenza-like illness among community-dwelling elderly: population-based cohort study in Japan. *Vaccine* 2006; 24:5546-51.
94. Nichol KL, Nordin J, Mullooly J, Lask R, Fillbrandt K, Iwane M. Influenza vaccination and reduction in hospitalizations for cardiac disease and stroke among the elderly. *N Engl J Med* 2003; 348:1322-32.
95. Nordin J, Mullooly J, Poblete S, Strikas R, Petrucci R, Wei F, et al. Influenza vaccine effectiveness in preventing hospitalizations and deaths in persons 65 years or older in Minnesota, New York, and Oregon: data from 3 health plans. *J Infect Dis* 2001; 184:665-70.
96. Voordouw BC, van der Linden PD, Simonian S, van der Lei J, Sturkenboom MC, Stricker BH. Influenza vaccination in community-dwelling elderly: impact on mortality and influenza-associated morbidity. *Arch Intern Med* 2003; 163:1089-94.
